# Supplementary material for: The ExoGAN generative AI framework enables extracellular vesicle-based immunotherapy
Source: Research Square preprint supplement (doi:10.21203/rs.3.rs-6915262/v1), 2025-06-29
Supplement: Supplementary file 1 [file c6663ccc5b289606daf30803.pdf]

# Supplementary Information

## **The ExoGAN generative AI framework enables extracellular vesicle-based immunotherapy**

Zachary F. Greenberg<sup>1</sup>, Tina Salehi Torabi<sup>2</sup>, Jiayu Huang<sup>2</sup>, Franco Krepel<sup>2</sup>, James A. Cahill<sup>4,6</sup>, David A. Ostrov<sup>3,5</sup>, Mei He<sup>1,5\*</sup>, Kiley S. Graim<sup>2,5,6\*</sup>

1. Department of Pharmaceutics, University of Florida, Gainesville, FL 32603, USA
2. Computer and Information Sciences and Software Engineering, University of Florida, Gainesville, FL 32611 USA.
3. Department of Pathology, Immunology and Laboratory Medicine, University of Florida College of Medicine, Gainesville, FL 32610, USA.
4. Engineering School of Sustainable Infrastructure and Environmental Engineering, University of Florida, Gainesville, FL 32611, USA
5. University of Florida Health Cancer Center, Gainesville, FL 32610, USA
6. University of Florida Genetics and Genomics Institute, Gainesville, FL 32610, USA

\* corresponding contacts: Dr. Mei He, [mhe@cop.ufl.edu](mailto:mhe@cop.ufl.edu); Dr. Kiley Graim, [kgraim@ufl.edu](mailto:kgraim@ufl.edu)

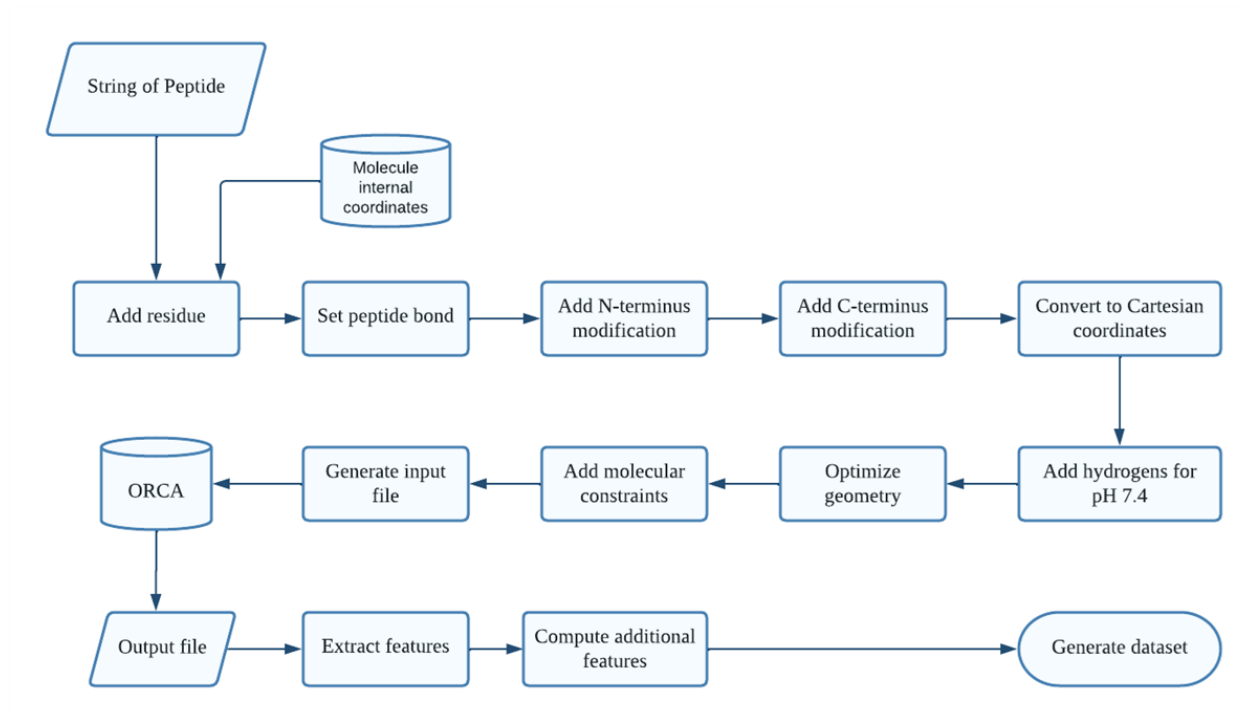

**Supplementary Fig s1.** Sequence preparation and physiochemical engineering workflow.

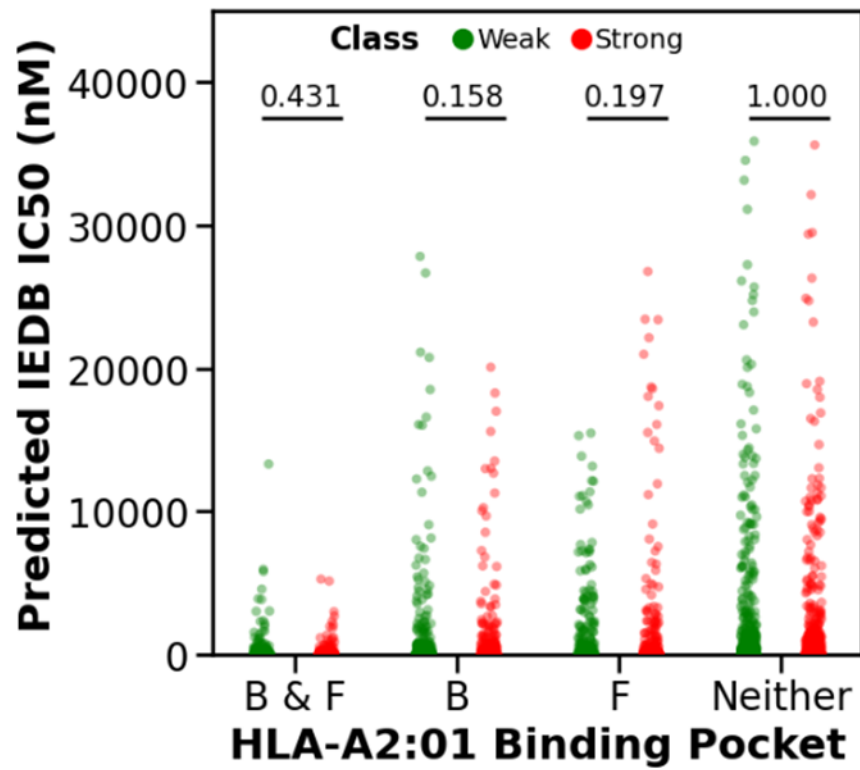

**Supplementary Fig s2.** Using a Dirichlet prior from the strong and weak binding peptide position weight matrices for conserved sequence prediction, we generated three sequences groups by fixing their residues for B and F pockets. These sequences were then predicted by NetMHCPan 4.1 and statistically evaluated with a Benjamini-Hochberg corrected two-sided Mann Whitney test.

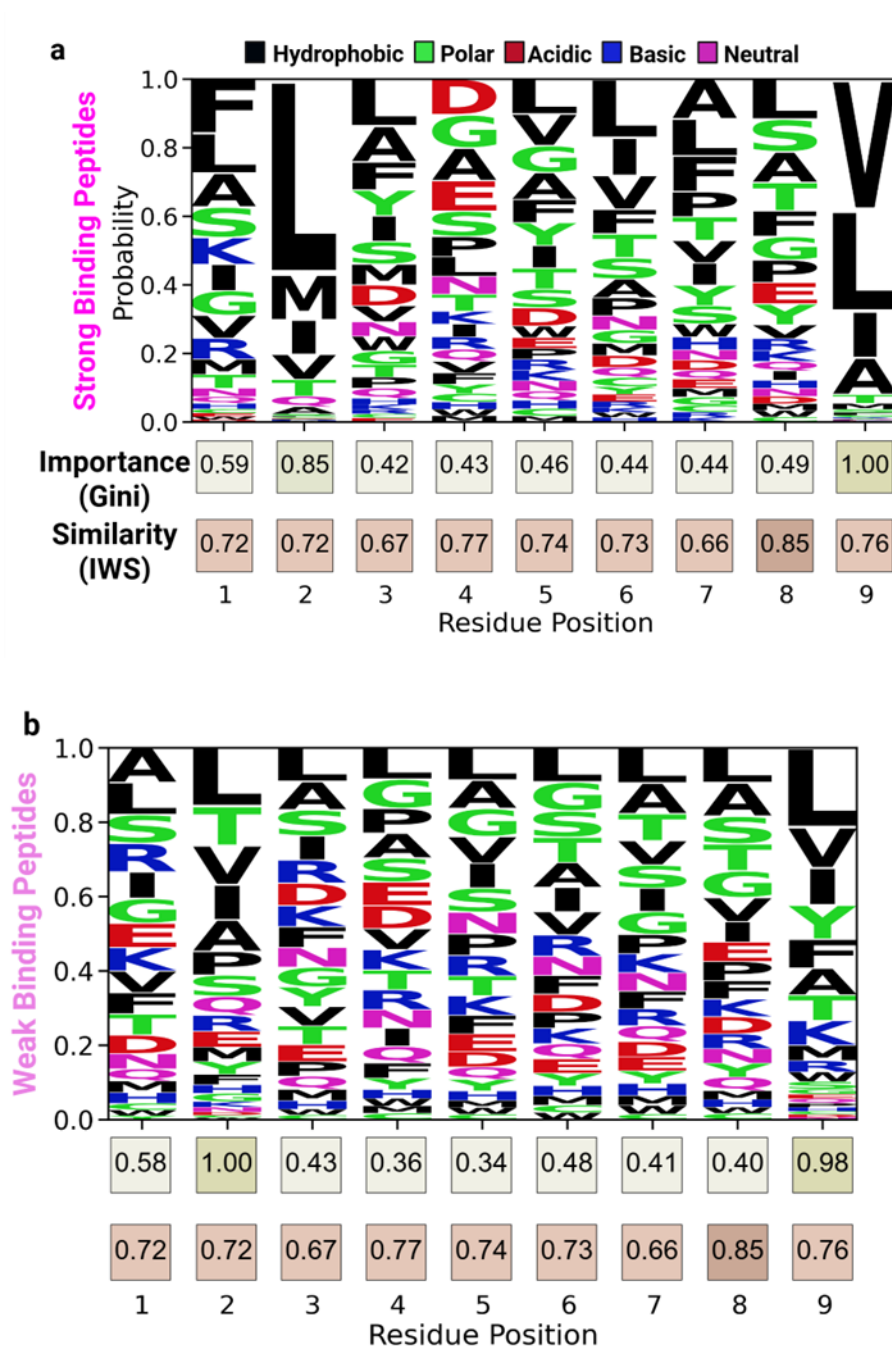

**Supplementary Fig s3. (a) Residue importance for antigens strongly binding HLA\*A02:01.** In IEDB's curated data for HLA\*A02:01, a total of 7860 antigens with harmonized binding affinities, as computed by Nielsen et al. <sup>38</sup>, are listed. Based on Nielsen et al. we binned the dataset into strong and weak binding antigens to assess residue importance for strong binding antigens. **(b) Residue importance for antigens weakly binding HLA\*A02:01.** Similar to (a), we separated out the weak binding antigens to assess their residue importance to bind HLA\*A02:01.



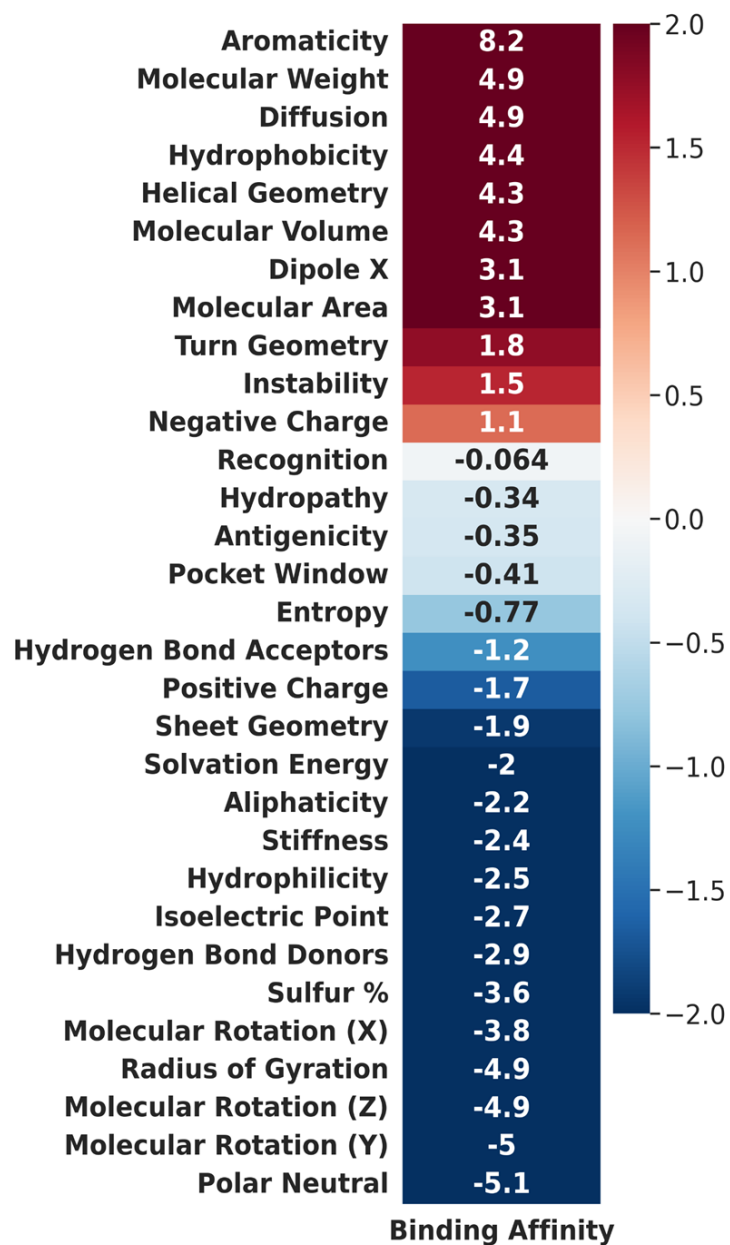

**Supplementary Fig s4.** Fisher's Z transformation was applied onto our feature engineering set to assess physiochemical feature importance of a peptide's binding affinity to HLA-A\*02:01.

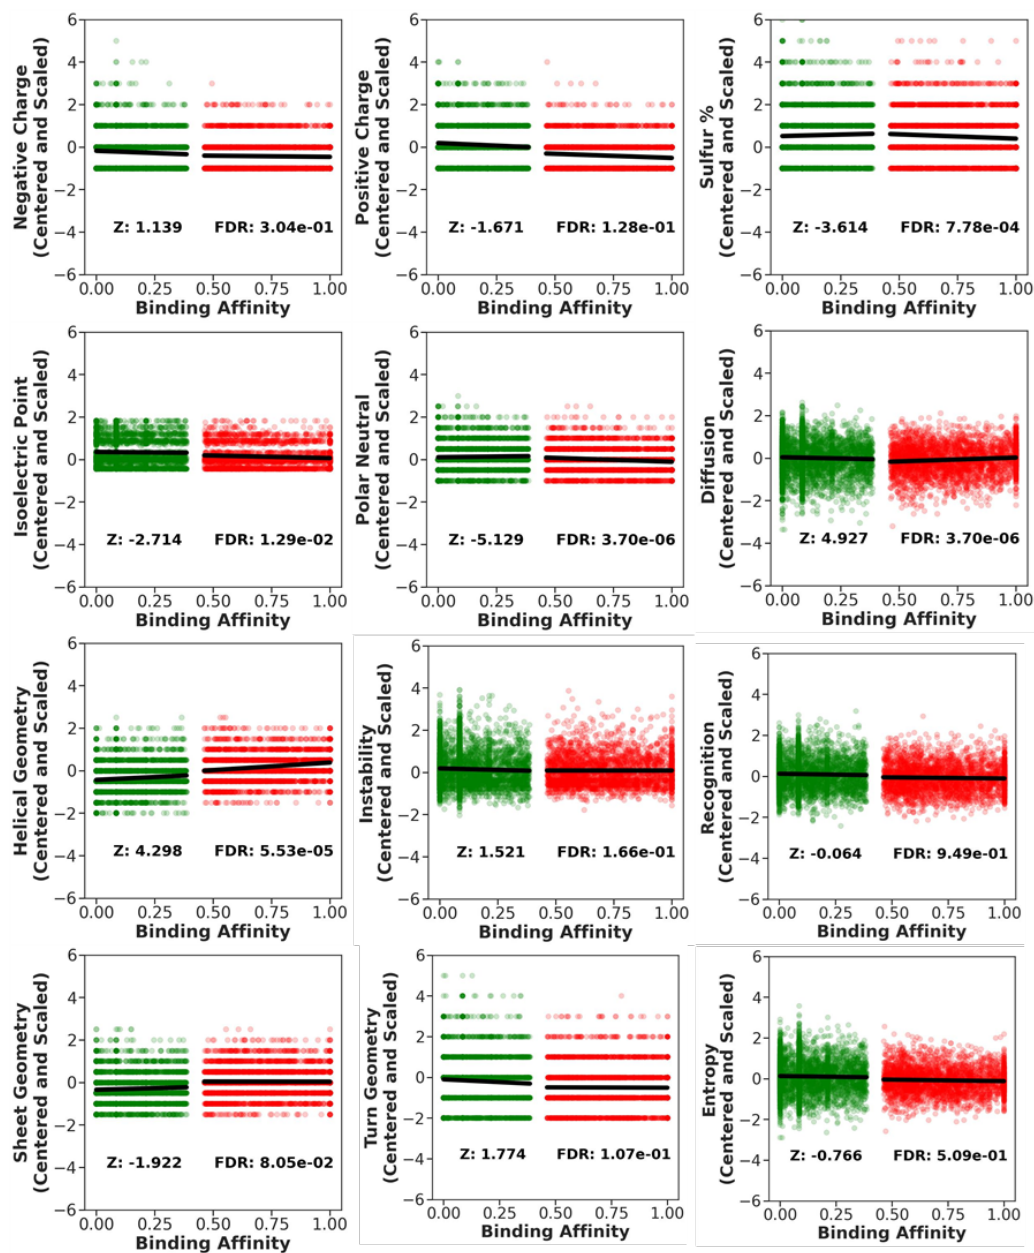

**Supplementary Fig s5.** We plotted the correlation between our scaled physiochemical features and each peptide's binding affinity to evaluate correlative statistical significance using a Benjamini-Hochberg corrected Fisher's Z-test. More physiochemical correlative plots are shown in Fig s6 and Fig s7.

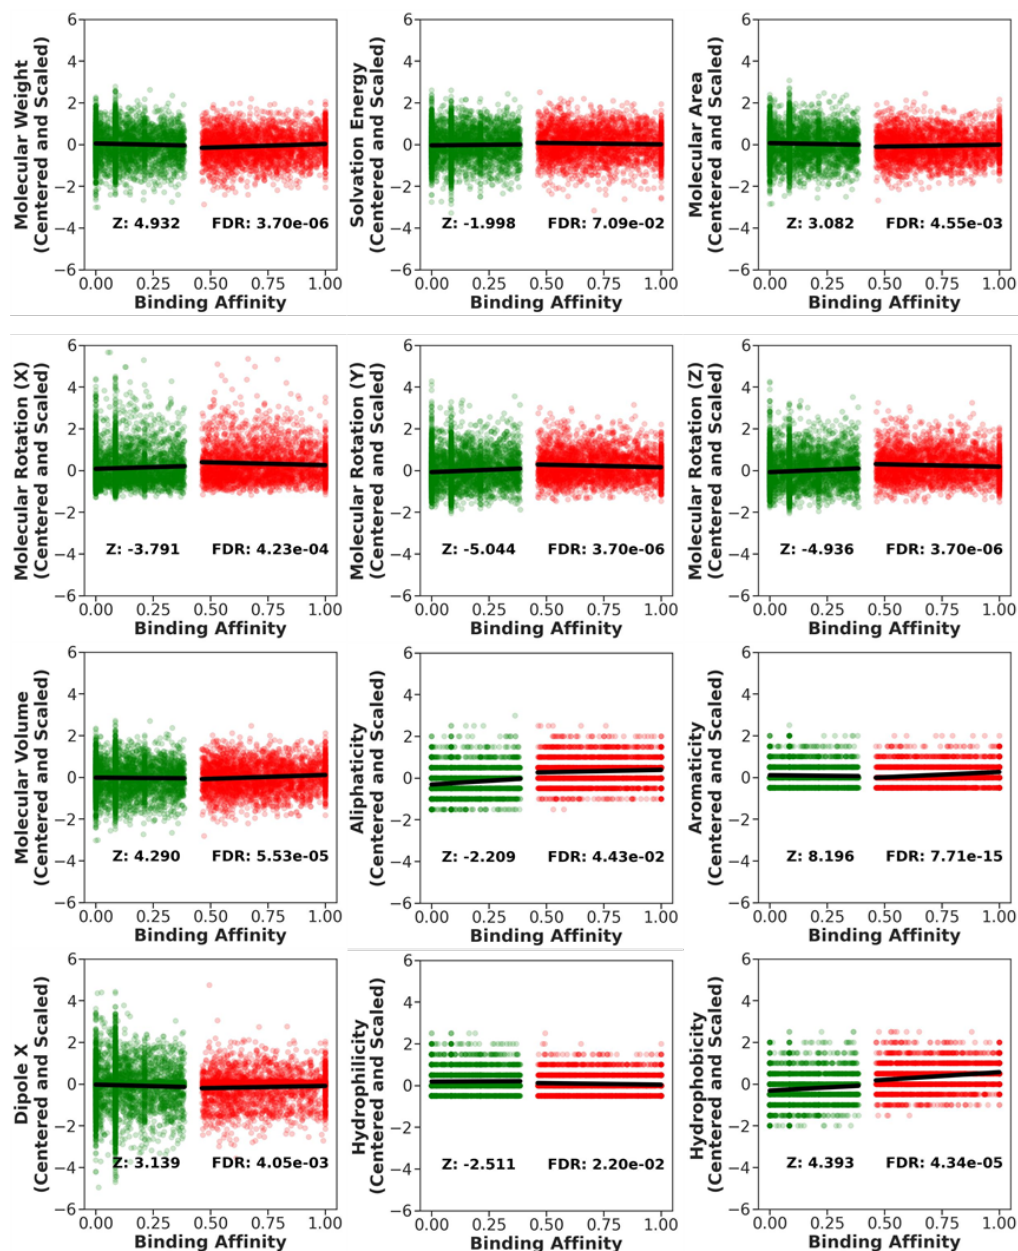

**Supplementary Fig s6.** We plotted the correlation between our scaled physiochemical features and each peptide's binding affinity to evaluate correlative statistical significance using a Benjamini-Hochberg corrected Fisher's Z-test. More physiochemical correlative plots are shown in Fig s7.

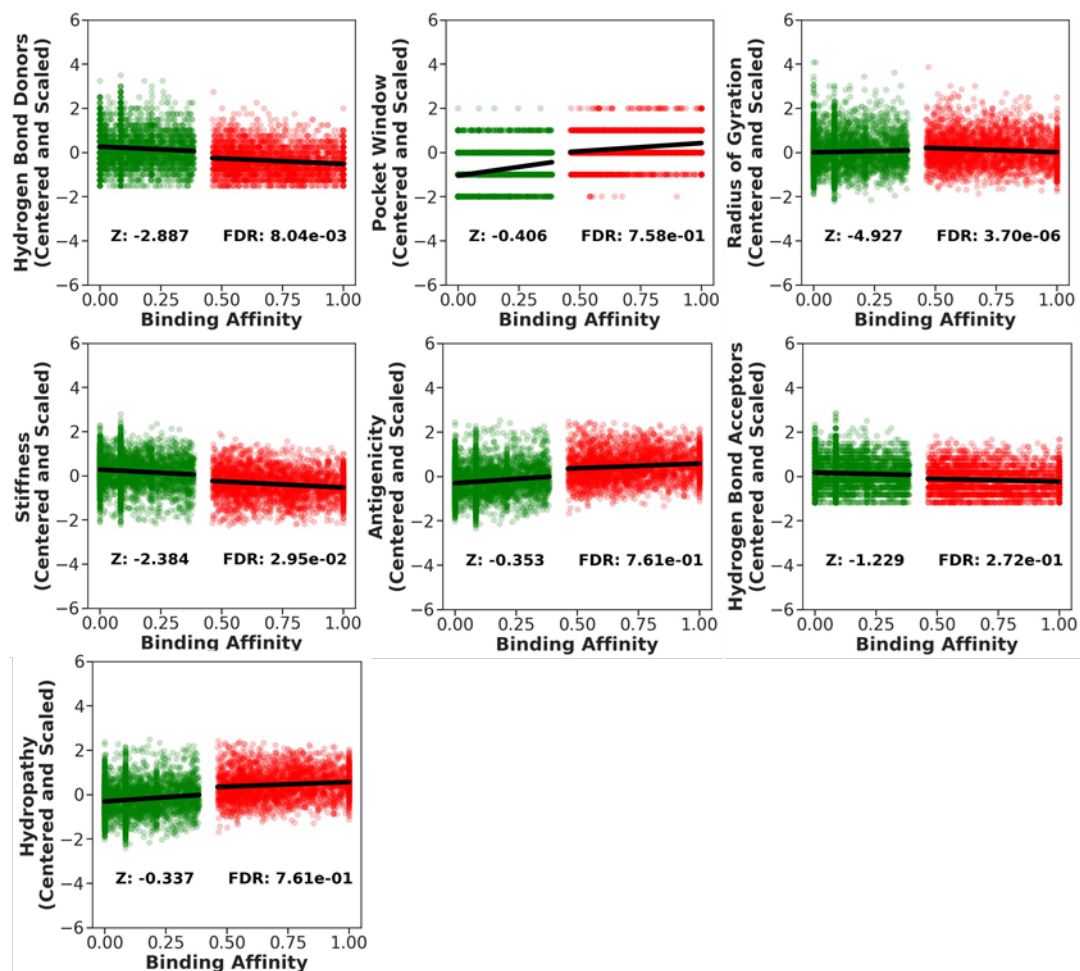

**Supplementary Fig s7. Physiochemical correlative plots.** We plotted the correlation between our scaled physiochemical features and each peptide's binding affinity to evaluate correlative statistical significance using a Benjamini-Hochberg corrected Fisher's Z-test.

## Physiochemistry

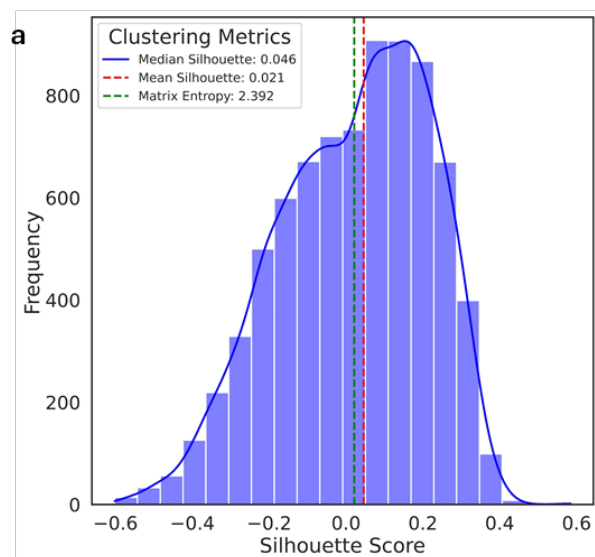

## Sequence Only

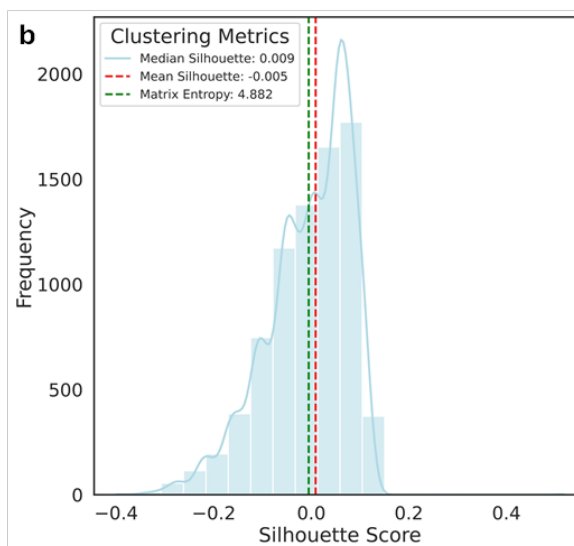

**Supplementary Fig s8. a. and b.** Quantifying feature set clustering performance by computing the per-sample silhouette distribution, median and mean silhouette score, and correlation matrix entropy.

| Metrics           | Models   |          |          |          |
|-------------------|----------|----------|----------|----------|
|                   | LR       | RF       | LDA      | SVM      |
| F1 Score          | 0.8021 ± | 0.8618 ± | 0.801 ±  | 0.8799 ± |
|                   | 0.0089   | 0.0102   | 0.0084   | 0.0107   |
| MCC               | 0.5926 ± | 0.7024 ± | 0.5711 ± | 0.751 ±  |
|                   | 0.0172   | 0.022    | 0.0178   | 0.0215   |
| Balanced Accuracy | 0.8049 ± | 0.8473 ± | 0.7824 ± | 0.8842 ± |
|                   | 0.0087   | 0.0114   | 0.0083   | 0.0106   |
| Specificity       | 0.7835 ± | 0.9053 ± | 0.857 ±  | 0.8624 ± |
|                   | 0.0157   | 0.0126   | 0.0158   | 0.0134   |
| Precision         | 0.6902 ± | 0.8298 ± | 0.7432 ± | 0.7936 ± |
|                   | 0.0143   | 0.0183   | 0.0192   | 0.0166   |
| Recall            | 0.8263 ± | 0.7893 ± | 0.7078 ± | 0.9061 ± |
|                   | 0.0164   | 0.0214   | 0.0169   | 0.0132   |
| AUC               | 0.8049 ± | 0.8473 ± | 0.7824 ± | 0.8842 ± |
|                   | 0.0087   | 0.0114   | 0.0083   | 0.0106   |

**Supplementary Table s1.** Classical model performance summary using physiochemical features to predict strong and weak binding peptides (StratifiedKFold = 10). LR is logistic regression, RF is random forest, LDA is linear discriminant analysis, and SVM is support vector machine.

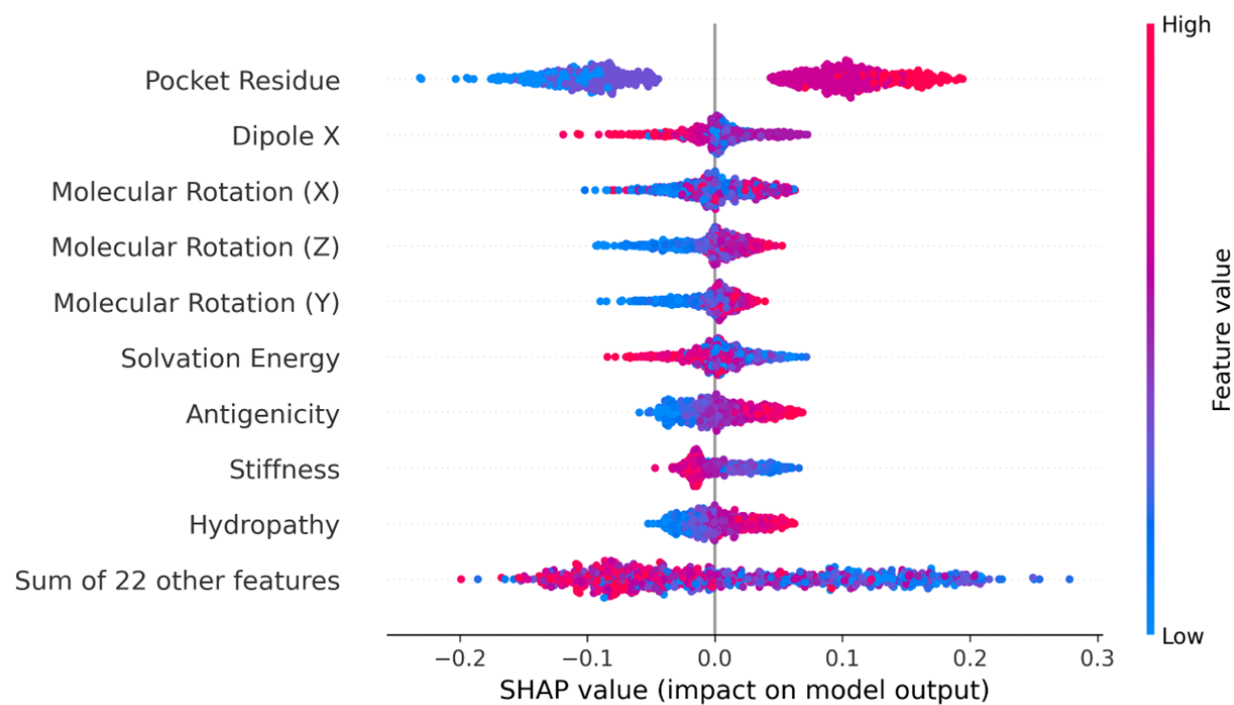

**Supplementary Figure s9. Random Forest SHAP analysis.** For Random Forest trained on the peptide physiochemistry feature set, a SHAP waterfall plot was visualized to assess predictor importance of predictor classifying strong and weak peptide binders.

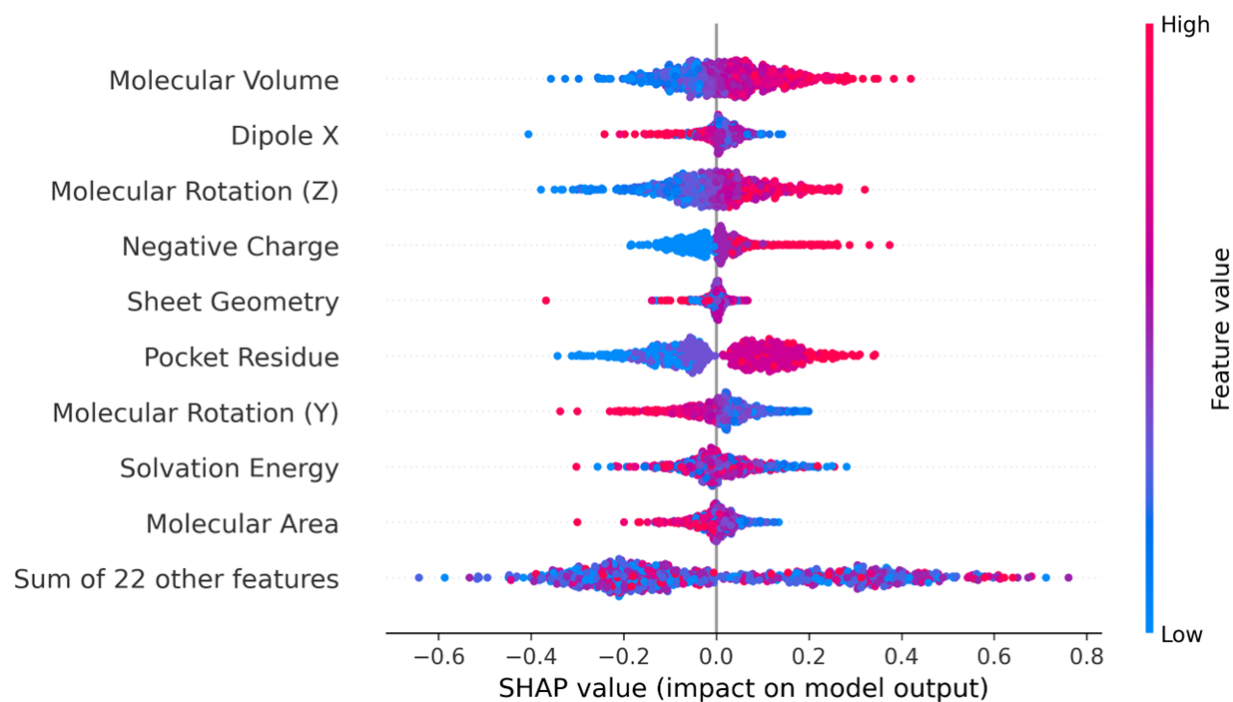

**Supplementary Figure s10. Support Vector Machine SHAP analysis.** For Support Vector Machine trained on the peptide physiochemistry feature set, a SHAP waterfall plot was visualized to assess predictor importance of predictor classifying strong and weak peptide binders.



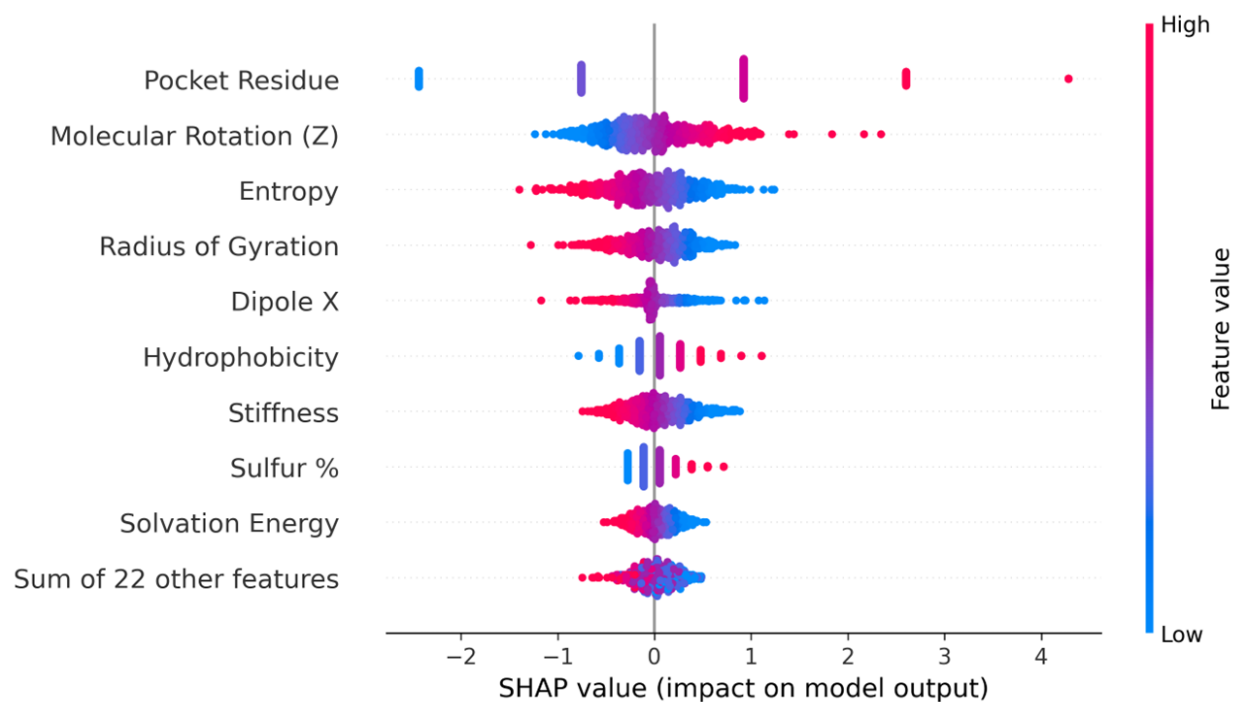

**Supplementary Figure s11. Logistic Regression SHAP analysis.** For Logistic Regression trained on the peptide physiochemistry feature set, a SHAP waterfall plot was visualized to assess predictor importance of predictor classifying strong and weak peptide binders.

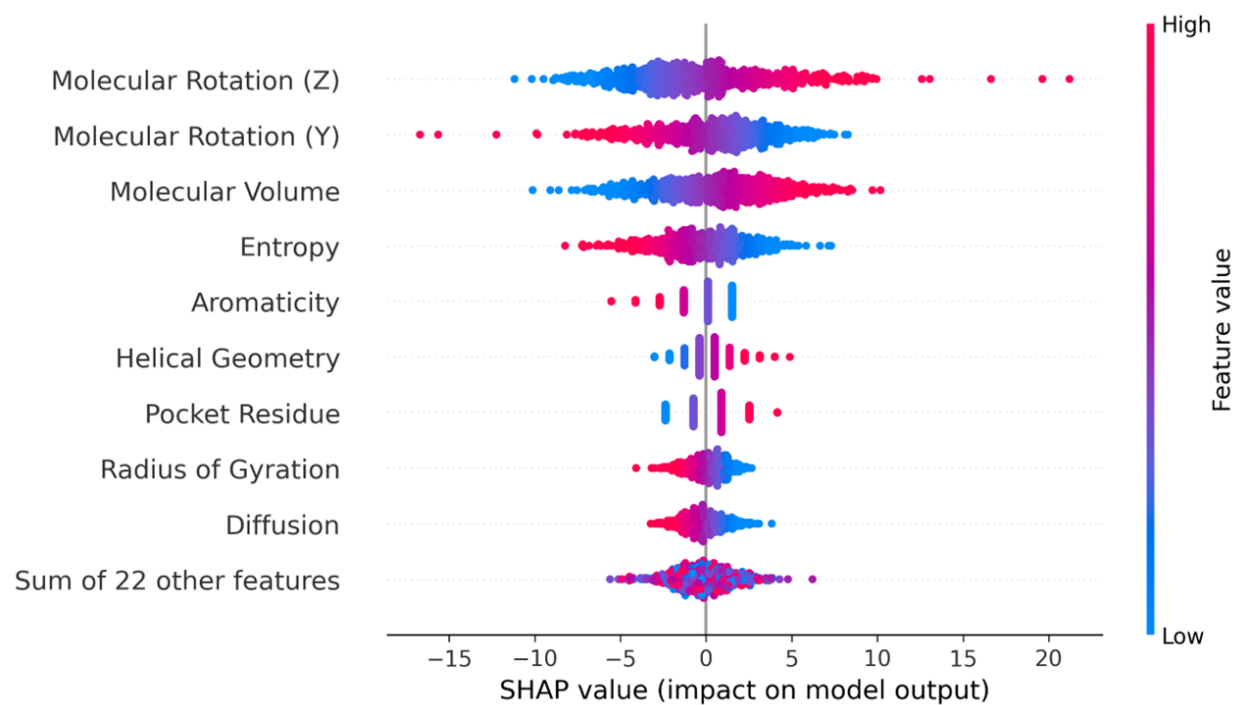

**Supplementary Figure s12. Linear Discriminant Analysis SHAP analysis.** For Linear Discriminant Analysis trained on the peptide physiochemistry feature set, a SHAP waterfall plot was visualized to assess predictor importance of predictor classifying strong and weak peptide binders

| Metrics            | Model                 |                   |                   |                   |
|--------------------|-----------------------|-------------------|-------------------|-------------------|
|                    | ExoGAN_D<br>(1-D CNN) | 2-D<br>CNN        | Transfo<br>rmer   | LSTM              |
| Balanced Accuracy  | 0.7647±<br>0.035      | 0.5859±<br>0.0281 | 0.7343±<br>0.0184 | 0.6774±<br>0.0225 |
| F1                 | 0.7814±<br>0.0337     | 0.6186±<br>0.0373 | 0.7495±<br>0.0184 | 0.706±<br>0.0176  |
| MCC                | 0.5326±<br>0.0701     | 0.2993±<br>0.0659 | 0.4656±<br>0.0364 | 0.3651±<br>0.04   |
| Specificity        | 0.83±<br>0.0489       | 0.9815±<br>0.0108 | 0.7885±<br>0.0329 | 0.8028±<br>0.0263 |
| Recall             | 0.6995±<br>0.0602     | 0.1904±<br>0.0596 | 0.6801±<br>0.036  | 0.552±<br>0.0598  |
| AUROC              | 0.8547±<br>0.0319     | 0.8403±<br>0.0224 | 0.8154±<br>0.0158 | 0.7762±<br>0.0209 |
| Compute Time (hrs) | 0.15                  | 0.18              | 120               | 72                |

**Supplementary Table s2.** Model architecture summary table evaluating different architecture performances to discriminate strong and weak binding peptides using sequence information

| Metrics            | Model                 |         |             |      |
|--------------------|-----------------------|---------|-------------|------|
|                    | ExoGAN_D<br>(1-D CNN) | 2-D CNN | Transformer | LSTM |
| Balanced Accuracy  | 1±0                   | 1±0     | 1±0         | 1±0  |
| F1                 | 1±0                   | 1±0     | 1±0         | 1±0  |
| MCC                | 1±0                   | 1±0     | 1±0         | 1±0  |
| Specificity        | 1±0                   | 1±0     | 1±0         | 1±0  |
| Recall             | 1±0                   | 1±0     | 1±0         | 1±0  |
| AUROC              | 1±0                   | 1±0     | 1±0         | 1±0  |
| Compute Time (hrs) | 0.15                  | 0.18    | 120         | 72   |

**Supplementary Table s3.** Model architecture summary table evaluating different architecture performances to discriminate strong and weak binding peptides using physiochemistry

| Metrics            | Model                 |                   |                   |                   |
|--------------------|-----------------------|-------------------|-------------------|-------------------|
|                    | ExoGAN_D<br>(1-D CNN) | 2-D CNN           | Transformer       | LSTM              |
| Balanced Accuracy  | 0.9671±<br>0.0188     | 0.9051±<br>0.0195 | 0.9959±<br>0.0027 | 0.9±<br>0.0201    |
| F1                 | 0.9717±<br>0.0164     | 0.9201±<br>0.0181 | 0.9962±<br>0.0025 | 0.9108±<br>0.0133 |
| MCC                | 0.9396±<br>0.035      | 0.8294±<br>0.0389 | 0.9918±<br>0.0055 | 0.8097±<br>0.0269 |
| Specificity        | 0.9847±<br>0.016      | 0.9655±<br>0.0151 | 0.997±<br>0.0026  | 0.9434±<br>0.0192 |
| Recall             | 0.9496±<br>0.0324     | 0.8446±<br>0.0278 | 0.9948±<br>0.0041 | 0.8566±<br>0.0539 |
| AUROC              | 0.9952±<br>0.0048     | 0.9797±<br>0.011  | 0.9997±<br>0.0008 | 0.9717±<br>0.0073 |
| Compute Time (hrs) | 0.15                  | 0.18              | 120               | 72                |

**Supplementary Table s4.** Classical model performance summary using physiochemical features to predict strong and weak binding peptides

| <b>Nemenyi-corrected Friedman Rank Aggregate Test</b> |                       |         |             |      |
|-------------------------------------------------------|-----------------------|---------|-------------|------|
| Model                                                 | ExoGAN_D<br>(1-D CNN) | 2-D CNN | Transformer | LSTM |
| ExoGAN_D<br>(1-D CNN)                                 | 1                     |         |             |      |
| 2-D CNN                                               | 0.893                 | 1       |             |      |
| Transformer                                           | 1                     | 0.018   | 1           |      |
| LSTM                                                  | 0.094                 | 1       | 0.000052    | 1    |

**Supplementary Table s5.** Statistical summary table evaluating each model architecture discriminating strong and weak binding peptides using both sequence and physiochemical information

| <b>Model</b> | <b>Balanced Accuracy</b> | <b>Wilcoxon Pairwise Test to ExoGAN</b> |
|--------------|--------------------------|-----------------------------------------|
| ACME         | $0.95 \pm 0.01$          | *                                       |
| MHCFlurry    | $0.9 \pm 0.00$           | **                                      |
| ExoGAN       | $0.97 \pm 0.02$          | NA                                      |

**Supplementary Table s6.** Statistical summary table evaluating each model to ExoGAN to discriminate HLA-A\*02:01 strong and weak binding peptides.

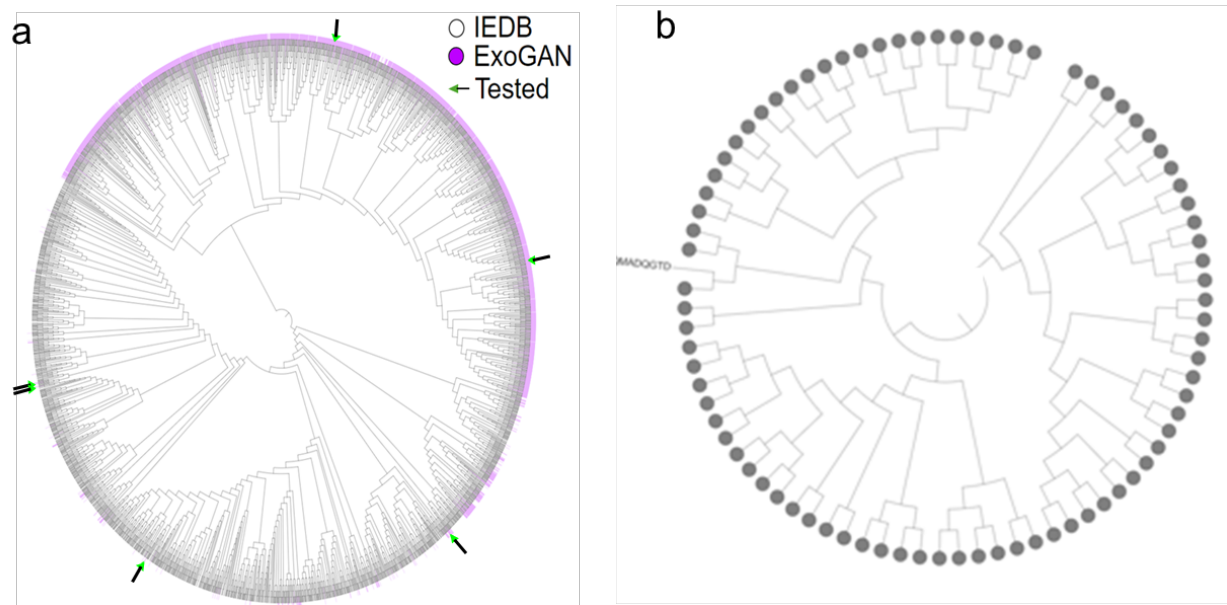

**Supplementary Figure s13.** (a). Phylogeny between ExoGAN generated and IEDB strong binding peptides was constructed using unweighted pair group means arithmetic (UPGMA) within a raw differences model. Colors highlight sequence location per class and arrows indicate experimental validation of selected peptides. (b). A condensed phylogeny was formed after grouping branches longer than 4.10 into their respective nodes.



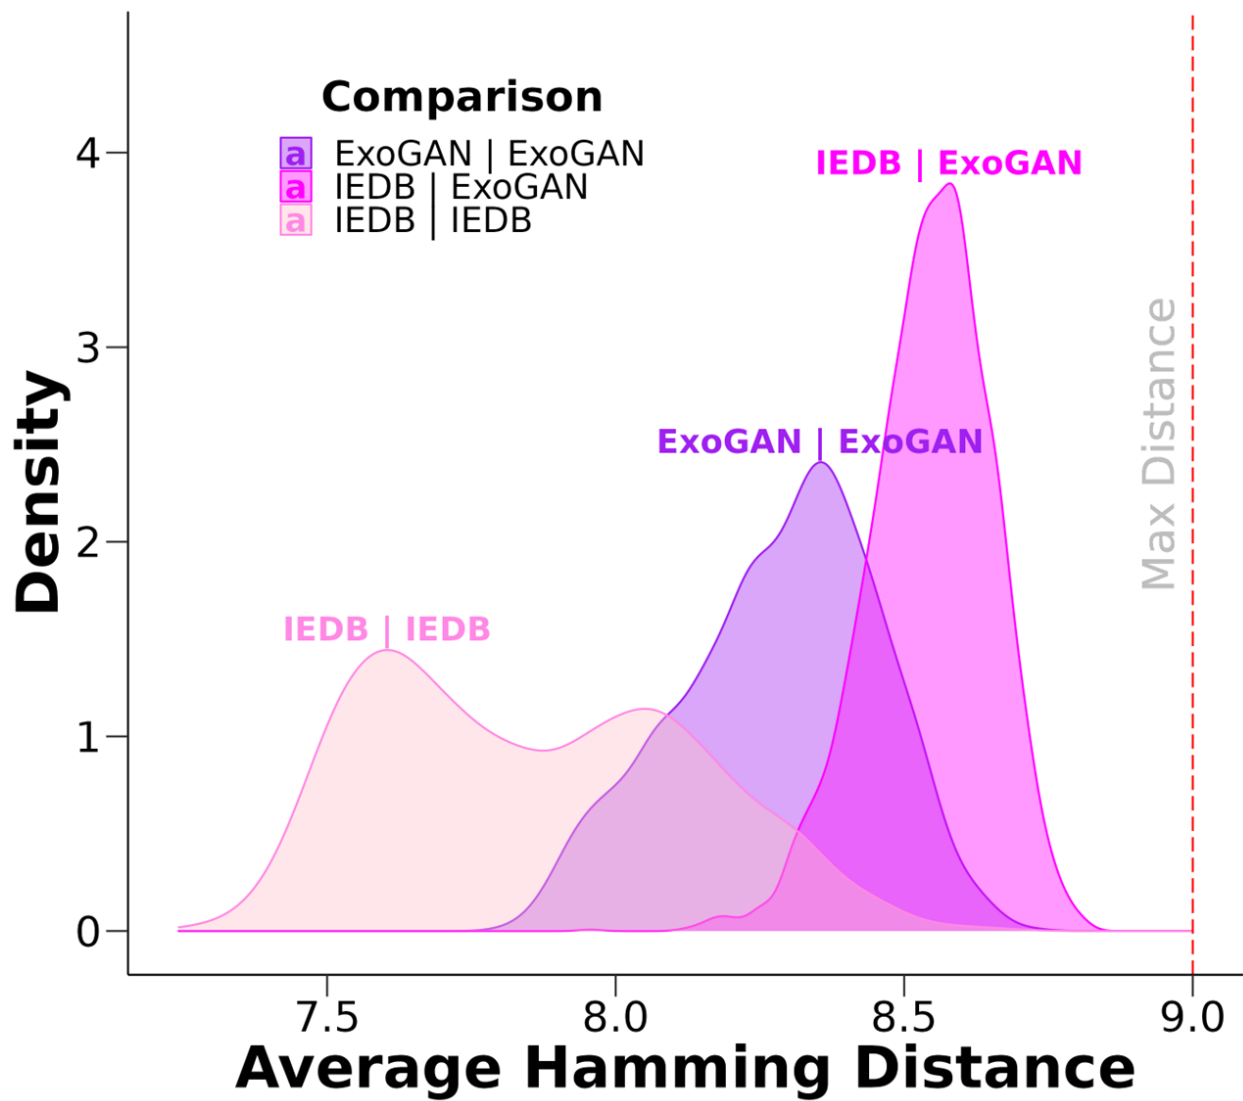

**Supplementary Figure s14.** A Hamming distance density plot showing the average sequence similarity of sequences compared to IEDB's strong binding peptides and ExoGAN-generated peptides. Higher values indicate more residues must change in one sequence to match the other sequence

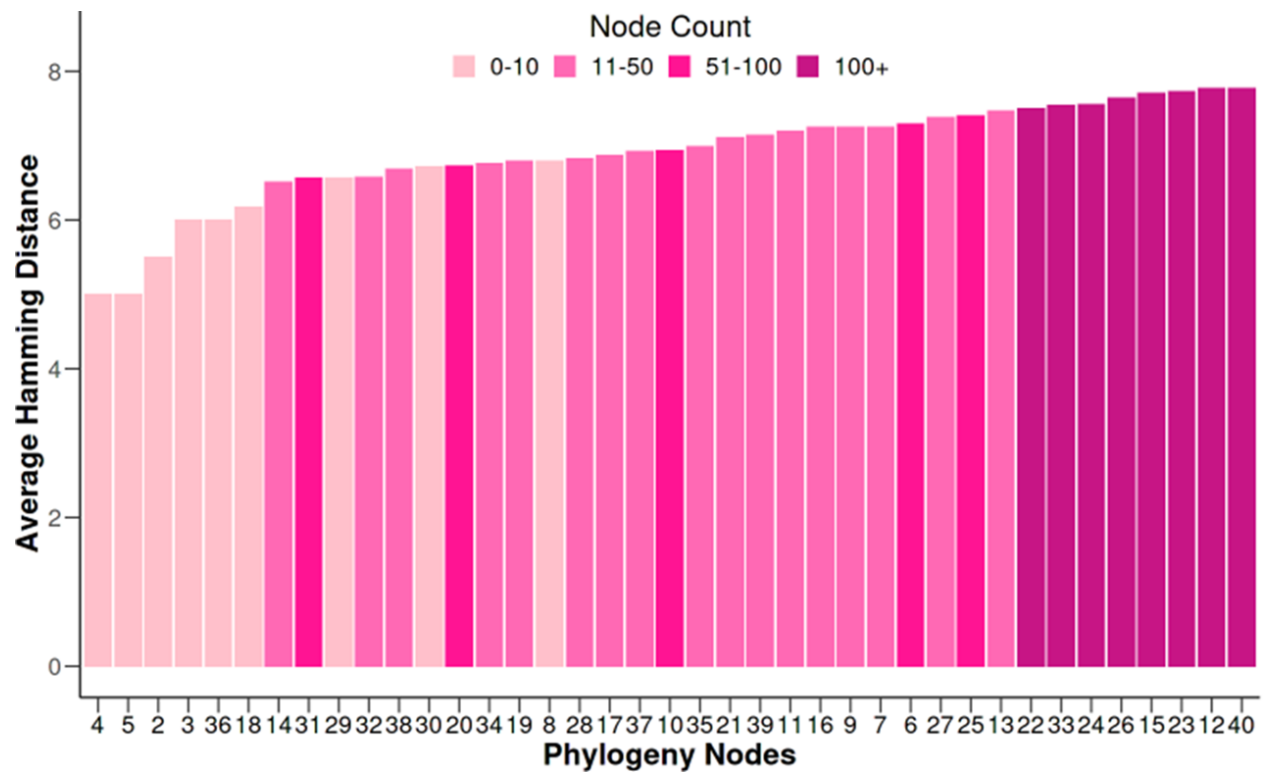

**Supplementary Figure s15.** A barplot sorted by the number of sequences in each node after condensing the phylogeny to assess the average sequence hamming distance in the node.

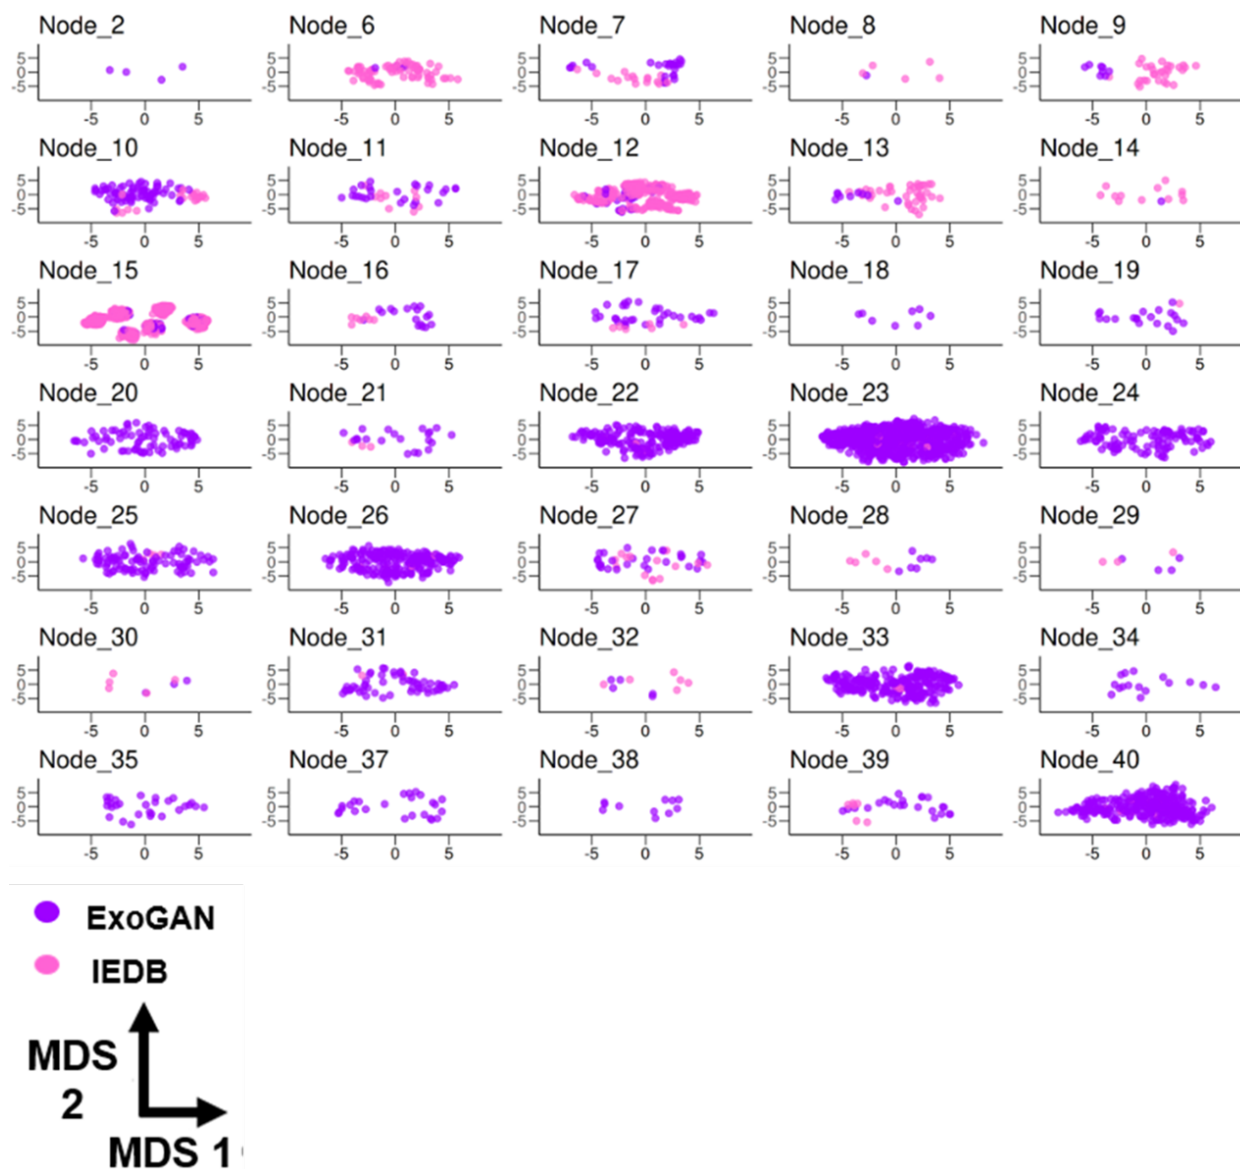

**Supplementary Figure s16.** Multidimensional scaling was performed on the condensed phylogeny nodes specific to each peptide's physiochemical features. Summarized counts are shown in Fig s15.

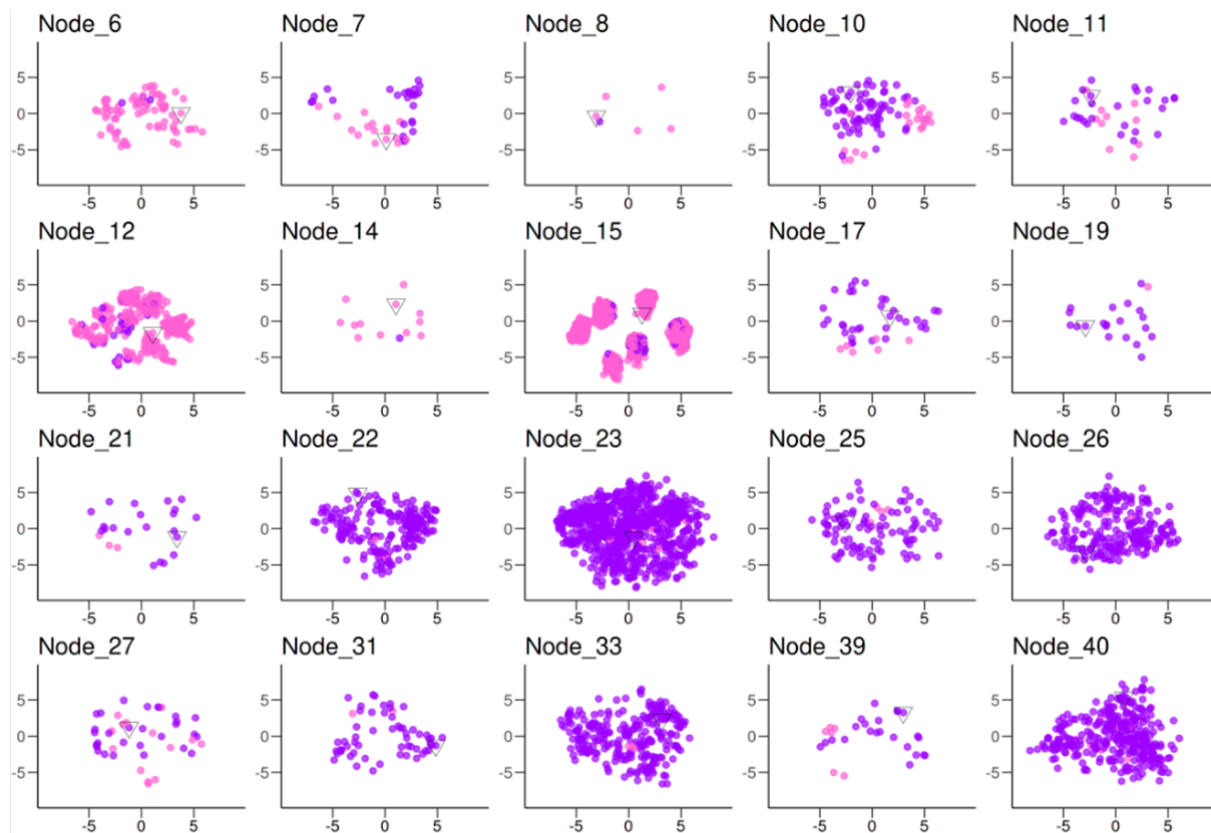

MDS  
2  
MDS 1

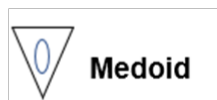

● ExoGAN  
● IEDB

**Supplementary Figure s17.** Multidimensional scaling was performed on the condensed phylogeny nodes specific to each peptide's physiochemical features and then filtered for geometric overlap between ExoGAN and IEDB.

| Node    | Peptide   | Average Hamming Distance | IEDB % | ExoGAN % |
|---------|-----------|--------------------------|--------|----------|
| Node 15 | CLICMDMVV | 7.611659                 | 95%    | 5%       |
| Node 17 | AAICTLLYD | 5.625                    | 15%    | 85%      |
| Node 23 | CDGDGRSQD | 6.754299754              | 3%     | 97%      |
| Node 19 | SGQSCRTHQ | 5.666666667              | 5%     | 95%      |
| Node 10 | EMNIIIV   | 5.567010309              | 23%    | 77%      |
| Node 7  | FLIHSRNHD | 7.095238                 | 38%    | 62%      |
| Node 6  | NIIYTLLII | 6.926829                 | 96%    | 4%       |
| Node 27 | DMEANYEEM | 6.302325581              | 33%    | 67%      |
| Node 14 | EVMIECPMC | 6.846154                 | 92%    | 8%       |
| Node 21 | KNHDIAQKQ | 6.333333333              | 13%    | 88%      |
| Node 12 | HMTWTRFGL | 7.458647                 | 89%    | 11%      |
| Node 31 | GEWISSSE  | 5.406779661              | 3%     | 97%      |
| Node 11 | HVEYQATEV | 5.861111111              | 28%    | 72%      |
| Node 22 | YNSEGMYS  | 6.608910891              | 2%     | 98%      |
| Node 39 | KPCSWAAHQ | 6.275862069              | 21%    | 79%      |
| Node 8  | FVMFNEDR  | 5.5                      | 83%    | 17%      |
| Node 40 | HNWRNAWLH | 6.930930931              | 3%     | 97%      |
| Node 25 | YYMYLILDQ | 6.53                     | 4%     | 96%      |
| Node 26 | WWSWVMKLV | 6.794759825              | 2%     | 98%      |
| Node 33 | KECLRRLYE | 6.761363636              | 1%     | 99%      |

**Supplementary Table s7.** The representative peptide for each cluster from the PAM clustering, their average hamming distance, and percentage of peptide types within the cluster (IEDB, ExoGAN).

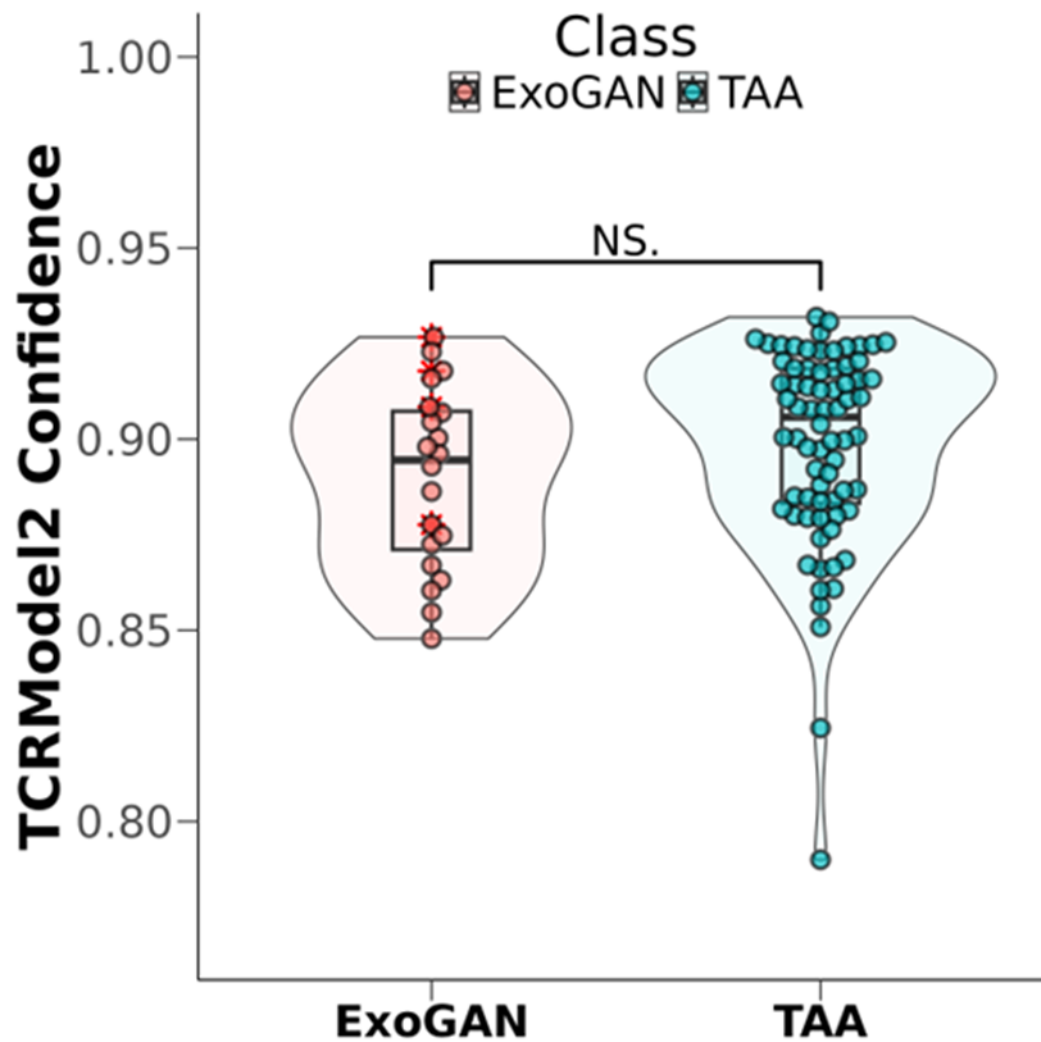

**Supplementary Figure s18.** TCRModel2 confidence to predict HLA\*A2:01 presentation of ExoGAN's representative peptides compared to known tumor associated antigens (TAA), using the DMF5 allele. Red stars indicate peptide sequences selected for further validation.

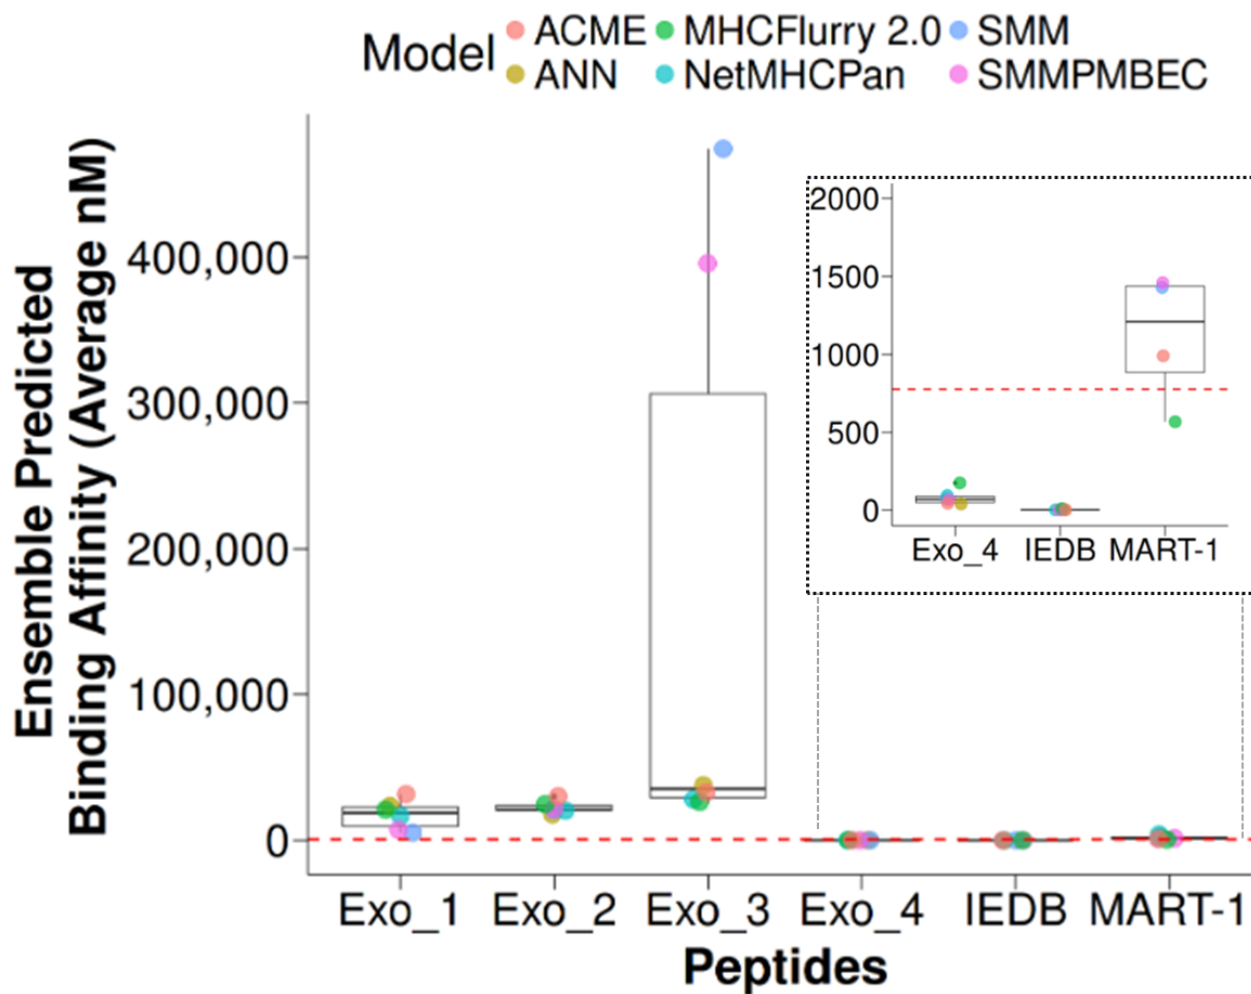

**Supplementary Figure s19.** Gold standard MHC-I binding prediction models were used to predict generated peptide affinity to HLA\*A02:01.

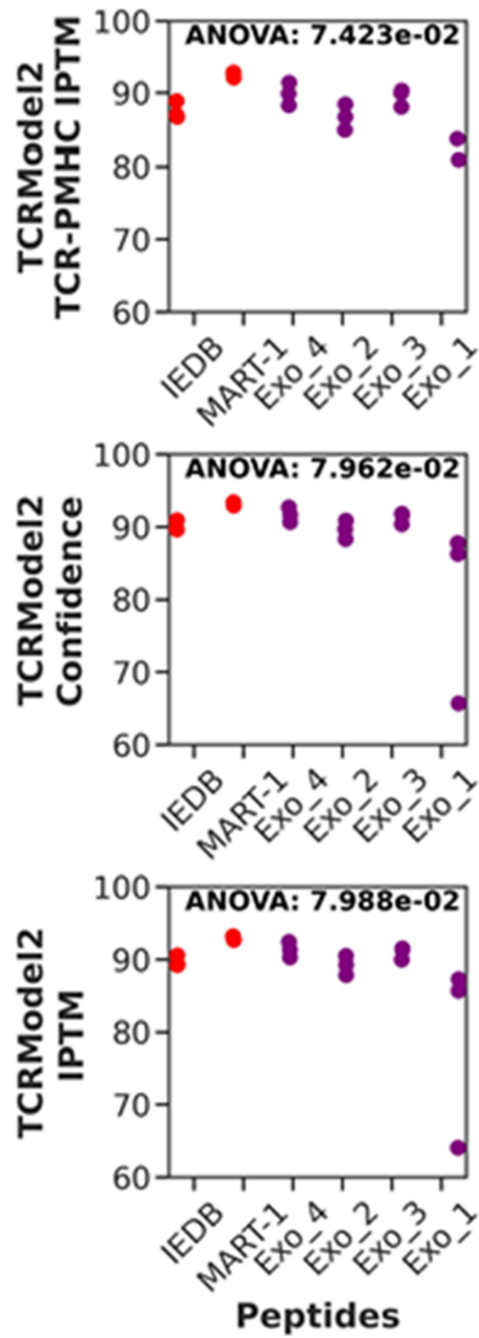

**Supplementary Figure s20.** TCRModel2 performance metrics assessing peptide presentation by HLA\*A2:01 (n=3 top models).



| Peptide  | Dissociation<br>Energy (kJ) |
|----------|-----------------------------|
| GL       | 3.18872515                  |
| poly-Gly | 7.24676806                  |

**Supplementary Table s8.** SMD analysis for the dipeptide (GL) and poly-Gly peptide to leave HLA-A2:01 5 nm away.

**a**

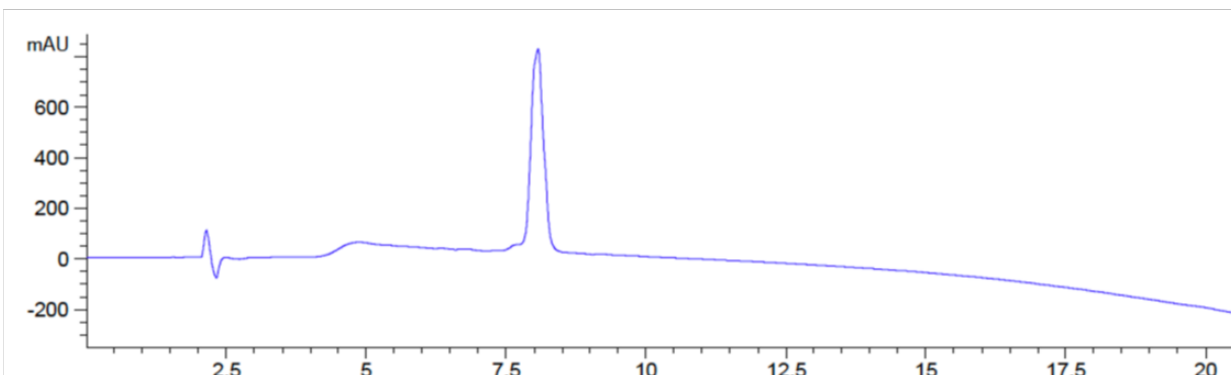

**b**

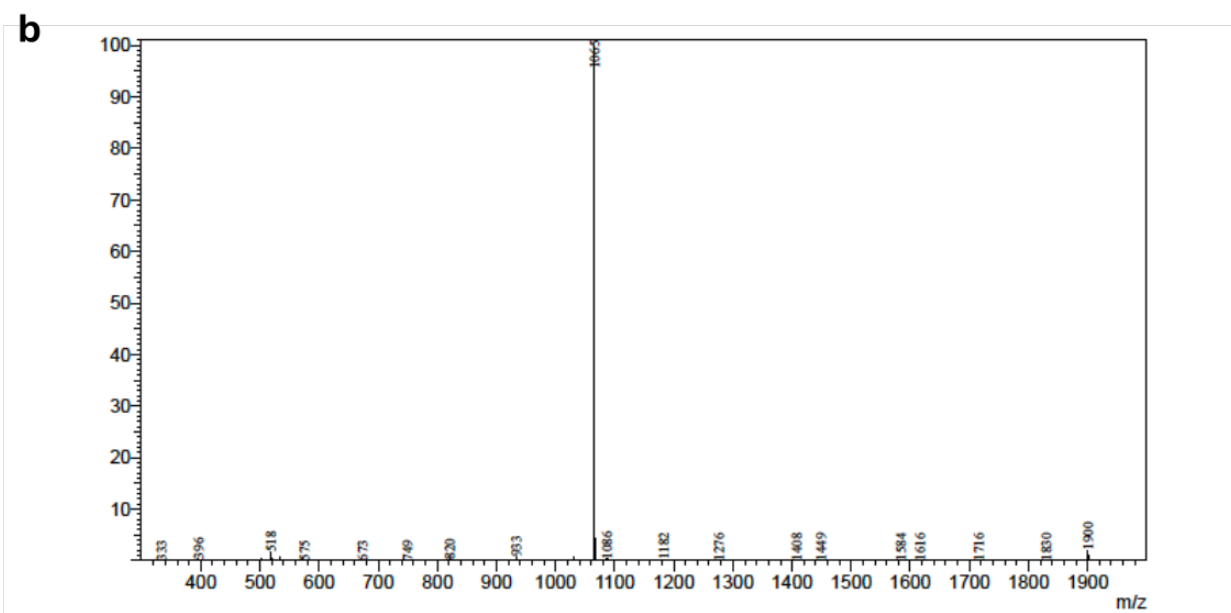

**Supplementary Figure s21. FLIDLAFLI synthesis. a.** HPLC chromatogram and **b.** Mass spectra for FLIDLAFLI.

**a**

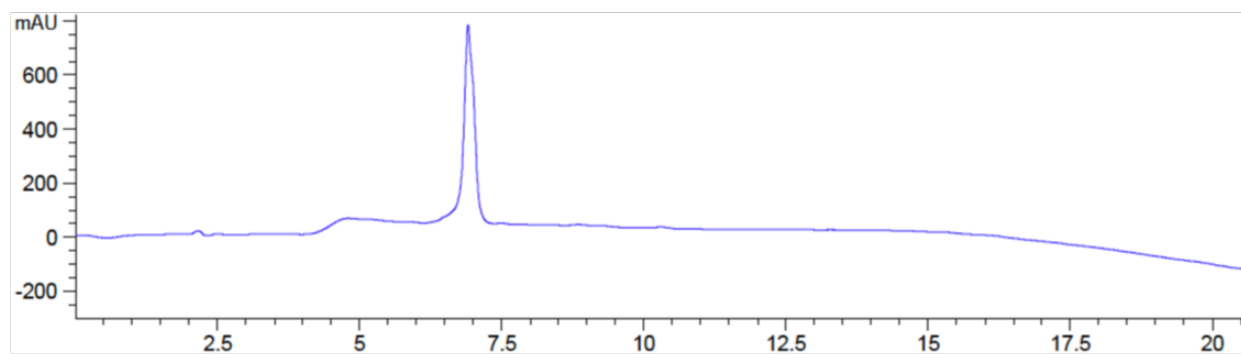

**b**

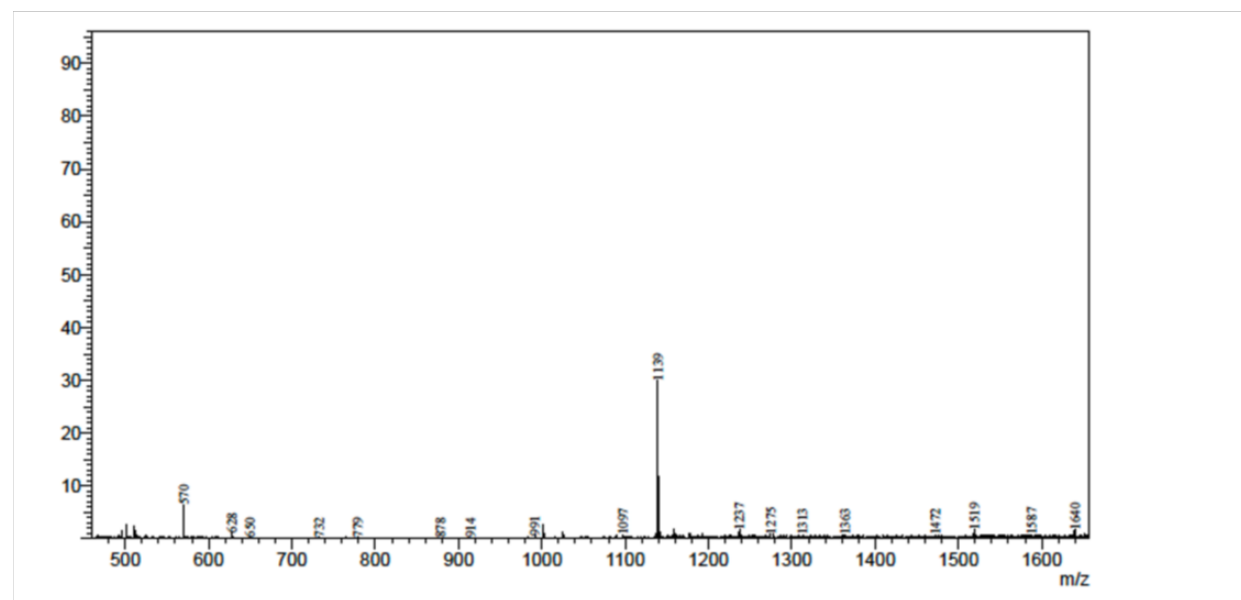

**Supplementary Figure s22. FLIHSRHND synthesis. a.** HPLC chromatogram and **b.** Mass spectra for FLIHSRHND.

**a**

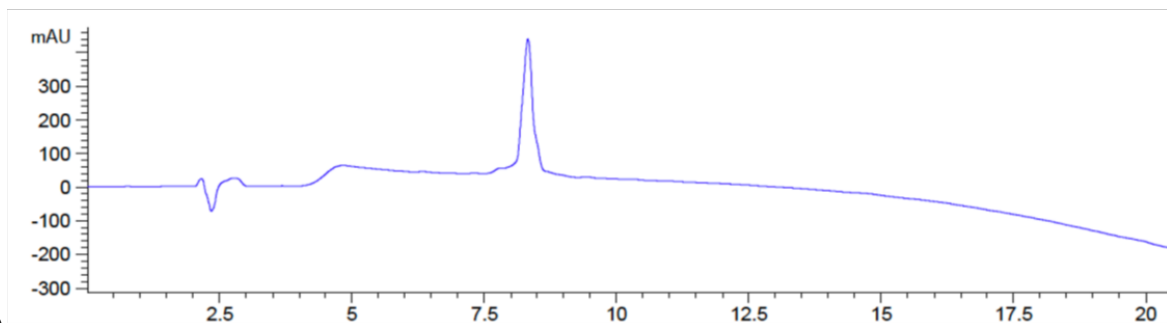

**b**

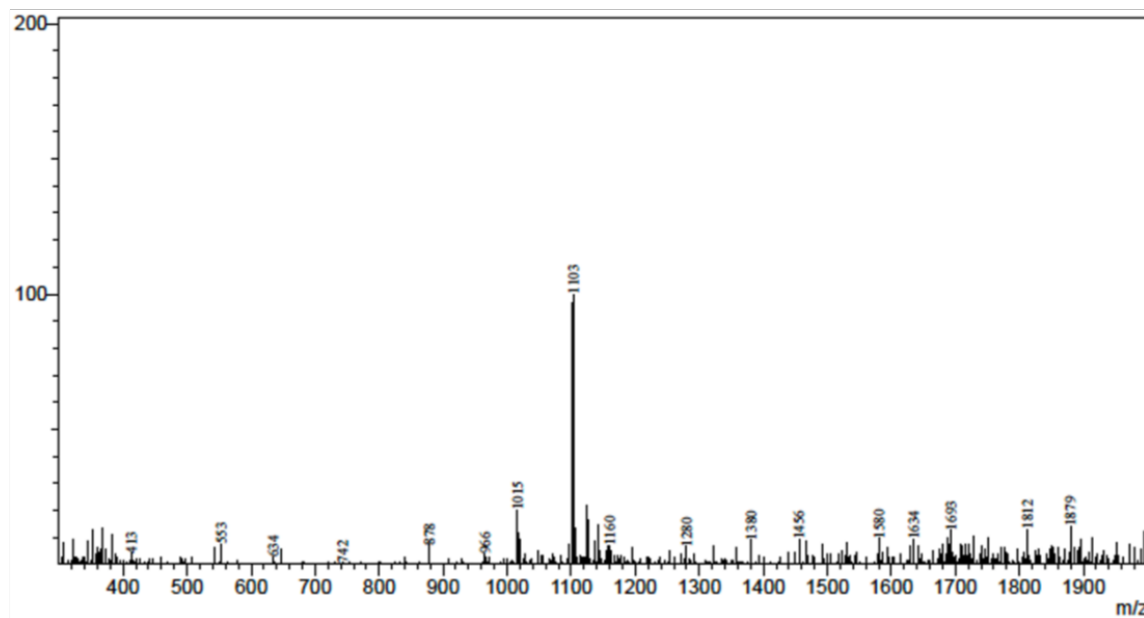

**Supplementary Figure s23. HHMNMSMSK synthesis. a.** HPLC chromatogram and **b.** Mass spectra for HHMNMSMSK.

**a**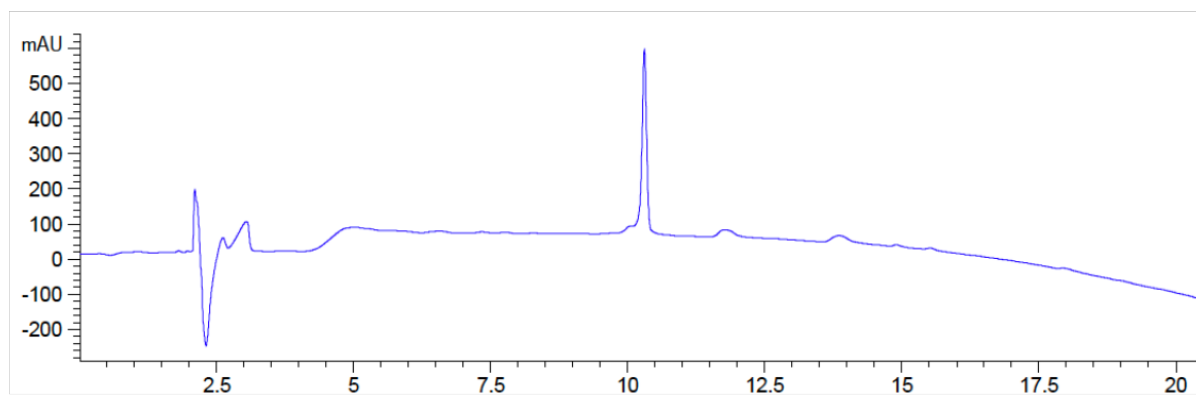**b**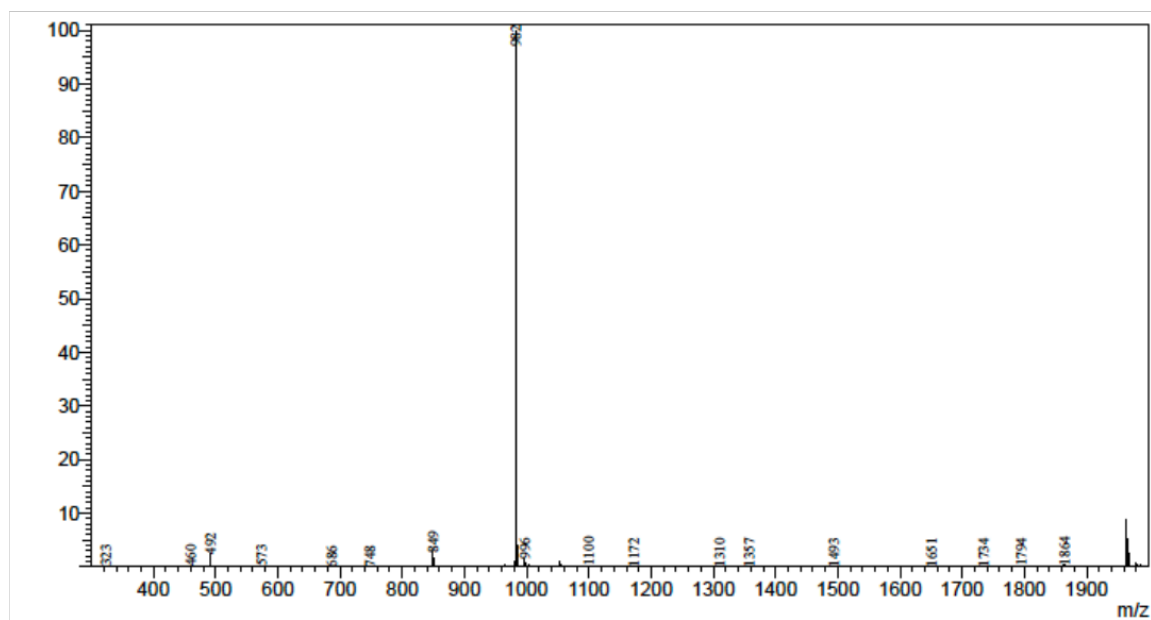

**Supplementary Figure s24. AAICTLLYD synthesis. a.** HPLC chromatogram and **b.** Mass spectra for AAICTLLYD.

**a**

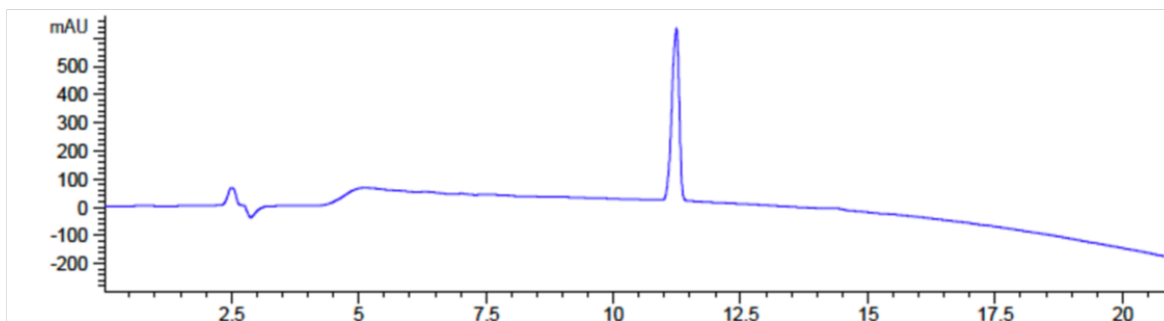

**b**

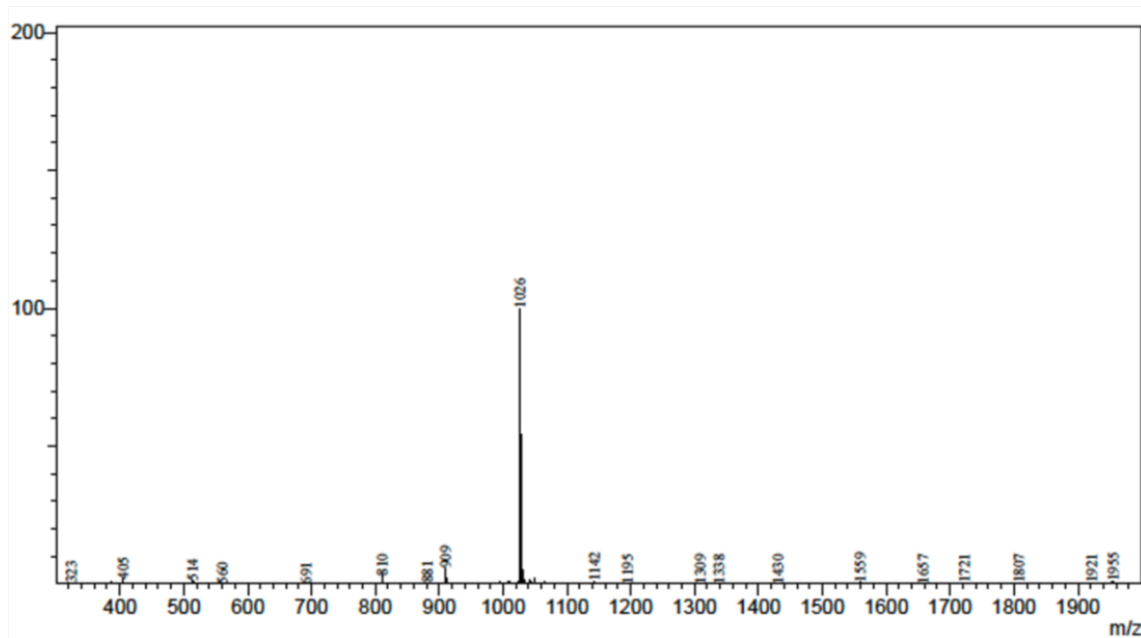

**Supplementary Figure s25. CLICMDMVV synthesis. a.** HPLC chromatogram and **b.** Mass spectra for CLICMDMVV.

**a**

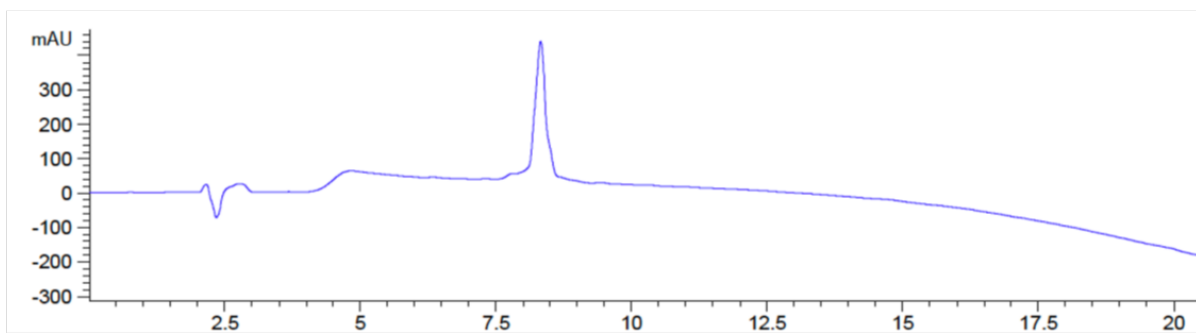

**b**

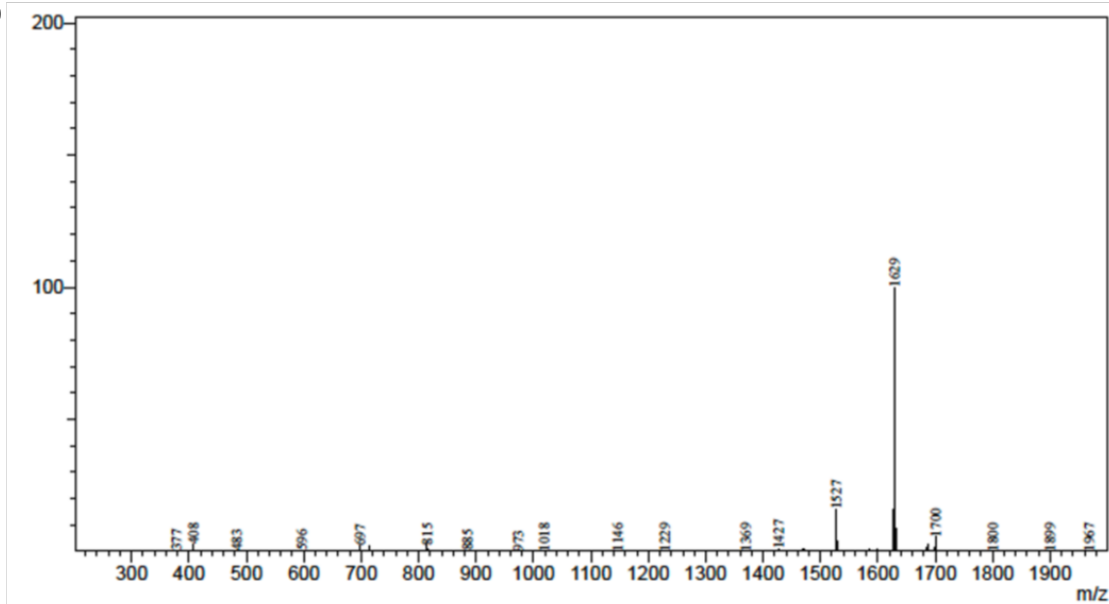

**Supplementary Figure s26. AAGIGILTV synthesis.** **a.** HPLC chromatogram and **b.** Mass spectra for AAGIGILTV.

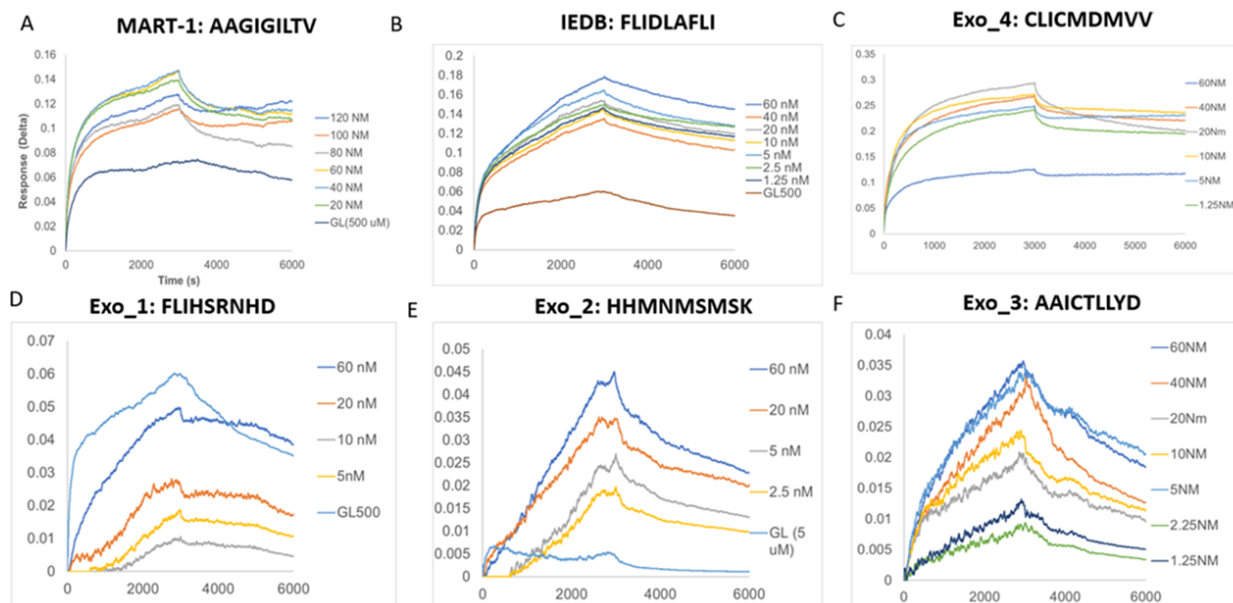

**Supplementary Figure s27.** Biolayer interferometric analysis and evaluation of binding affinity to HLA\*A02:01. The dipeptide, GL, was used at 500 uM as a reference control.



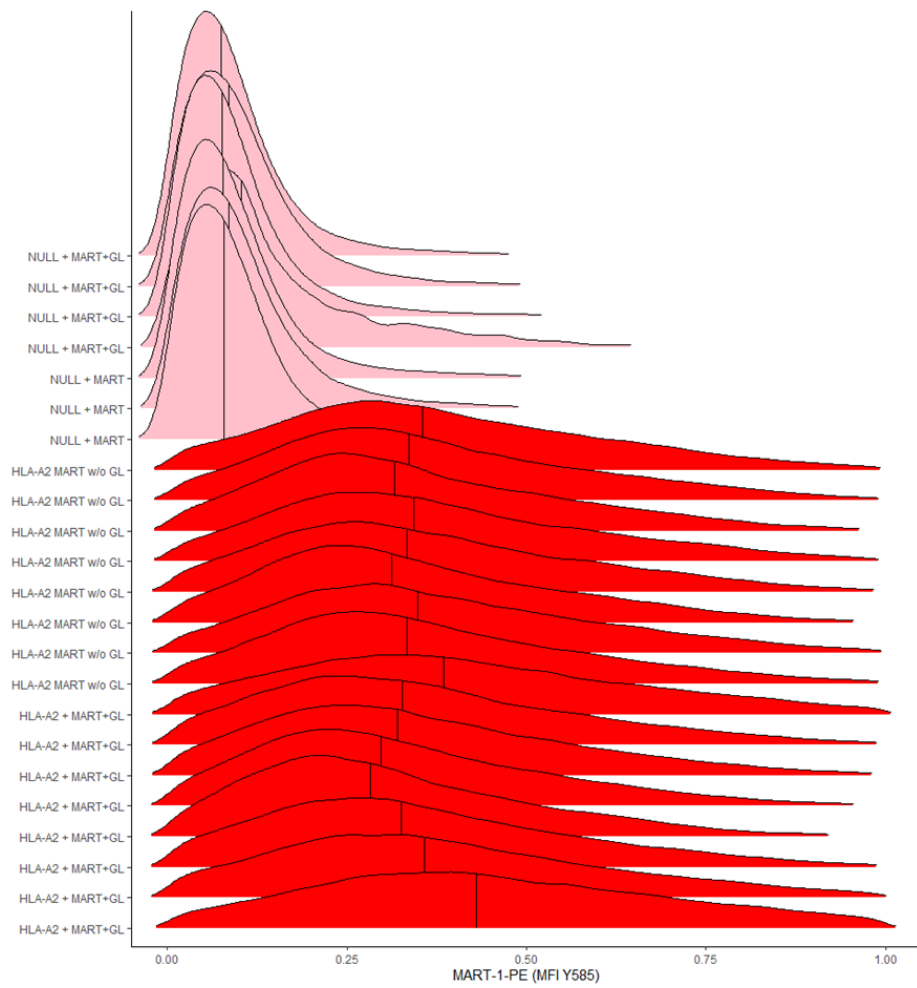

**Supplementary Figure s28.** As reported by Saini et al, we performed a sequence exchange assay for HLA\*A02:01 using with-and-without dipeptide. NULL indicates K562 cells that do not express HLA\*A02:01 (K-) while HLA-A2 are K562 cells that do express HLA\*A02:01 (K+).

## Supplementary Note 1.1

### Physiochemical Feature Information

Each of ExoGAN's physiochemical features were curated by either parsing through literature, using Biopython, or modifying existing equations to represent a peptide's physiochemical contribution to MHC-I's chemical potential. Below, we stratified the features into three categories: Peptide physiochemistry, peptide description, and MHC-I association. References listed detail their origination.

#### Peptide physiochemistry

| Physiochemistry                  | Definition                                                                                         | Equation                                                                  | Reference |
|----------------------------------|----------------------------------------------------------------------------------------------------|---------------------------------------------------------------------------|-----------|
| Dipole Moment<br>(X, Y, Z)       | Magnitude of molecular charge in each cartesian direction from Coulomb repulsion                   | $\hat{J}_j(1)f_i(1) = f_i(1) \int  \varphi_j(2) ^2 \frac{1}{r_{12}} dr_2$ | 1-5       |
| Diffusion                        | Represents the speed of how fast a peptide will transport in extracellular milieu                  | $D = \frac{K_b T}{6 \times \pi \times \eta_{blood} \times R_g}$           | 6         |
| Entropy                          | Represents the peptide's tendency for molecular motions, normalized to length                      | $\frac{1}{n} \sum_{i=1}^n [Amino\ Acid]_i$                                | 7         |
| Molecular Area                   | Represents the molecular surface area (Solvent excluded area)                                      | <i>GEPOL Algorithm</i>                                                    | 3,8       |
| Molecular Rotation<br>(X, Y, Z)  | Represents the rotational motion of a peptide                                                      | $XYZ = \frac{\pi (\frac{kT}{hc})^3}{(Q_{int} \times \sigma)^2}$           | 9         |
| Molecular Volume                 | Represents the molecular volume (Solvent excluded volume)                                          | <i>GEPOL Algorithm</i>                                                    | 3,8       |
| Radius of Gyration<br>(Modified) | Represents the peptide's radius by considering its center of mass assuming all conformation states | $\sqrt{\frac{1}{2} \times MW \times B_{eff\_pep}}$                        | 6         |
| Stiffness                        | Elasticity of peptide given indexed amino acids averaged of a window                               | Vihinen algorithm                                                         | 10-12     |
| Solvation Energy                 | Represents the Gibb's Free Energy of a peptide in water                                            | $\Delta G_S = \Delta G_{ENP} + \Delta G_{CDS}$                            | 1-5       |

## Peptide description

| Descriptions            | Definition                                                                                          | Equation                                                                   | Reference |
|-------------------------|-----------------------------------------------------------------------------------------------------|----------------------------------------------------------------------------|-----------|
| Aliphaticity            | Residues providing interactions for hydrocarbons, normalized to length                              | $\frac{1}{n} \sum_{i=1}^n 1_{\alpha_i \in \{V,I,L,M\}}$                    | 13        |
| Aromaticity             | Residues providing interactions for non-polar, $\pi$ - $\pi$ interactions, normalized to length     | $\frac{1}{n} \sum_{i=1}^n 1_{\alpha_i \in \{F,W,Y,H\}}$                    | 13        |
| Helical Geometry        | Residues providing helical secondary structure, normalized to length                                | $\frac{1}{n} \sum_{i=1}^n 1_{\alpha_i \in \{V,I,Y,F,W,L\}}$                | 14        |
| Hydrogen Bond Acceptors | Residues receiving hydrogen bonds, weighted by # of acceptors, normalized to length                 | $\frac{1}{n} \sum_{i=1}^n K \times 1_{\alpha_i \in \{N,D,Q,S,T,E,H,Y\}}$   | 13        |
| Hydrogen Bond Donors    | Residues donating hydrogen bonds, weighted by # of donors, normalized to length                     | $\frac{1}{n} \sum_{i=1}^n K \times 1_{\alpha_i \in \{R,K,N,Q,S,T,W,H,Y\}}$ | 13        |
| Hydropathy              | Kyte-Doolittle's representation of globular protein folding, normalized to length                   | $\frac{1}{n} \sum_{H=1}^n [Amino\ Acid]_H$                                 | 15        |
| Hydrophilicity          | Residues providing affinity for aqueous solutions; polar interactions, normalized to length         | $\frac{1}{n} \sum_{i=1}^n 1_{\alpha_i \in \{S,T,H,N,Q,E,D,K,R\}}$          | 13        |
| Hydrophobicity          | Residues providing affinity for oils/fats/lipids; non-polar interactions, normalized to length      | $\frac{1}{n} \sum_{i=1}^n 1_{\alpha_i \in \{V,I,L,F,W,Y,M\}}$              | 13        |
| Instability             | Residues contributing to local structural disorder                                                  | $\sum_{G=1}^n [Amino\ Acid]_G$                                             | 16        |
| Isoelectric Point       | pH where net electric charge of the various peptide states in the extracellular environment is zero | $\sum_{Iso=1}^n [Amino\ Acid]_{Iso}$                                       | 13        |
| Negativity              | Residues that provide a negative electric charge to the peptide at pH 7.4                           | $\frac{1}{n} \sum_{i=1}^n 1_{\alpha_i \in \{D,E\}}$                        | 13        |
| Polar Neutral           | Residues that provide polar character but no electric charge                                        | $\frac{1}{n} \sum_{i=1}^n 1_{\alpha_i \in \{S,T,C,M,N,Q\}}$                | 13        |
| Positive Charge         | Residues that provide a positive electric charge to the peptide at pH 7.4                           | $\frac{1}{n} \sum_{i=1}^n 1_{\alpha_i \in \{K,R,H\}}$                      | 13        |
| Sheet Geometry          | Residues providing sheet secondary structure, normalized to length                                  | $\frac{1}{n} \sum_{i=1}^n 1_{\alpha_i \in \{E,M,A,L\}}$                    | 14        |
| Sulfurarity             | Residues providing sulfur character, normalized to length                                           | $\frac{1}{n} \sum_{i=1}^n 1_{\alpha_i \in \{S,C,T,M\}}$                    | 13        |
| Turn Geometry           | Residues providing turns/loops to the secondary structure, normalized to length                     | $\frac{1}{n} \sum_{i=1}^n 1_{\alpha_i \in \{N,P,G,S\}}$                    | 14        |
| Molecular Weight        | Sum of amino acid molecular weights                                                                 | $\sum_{i=1}^n [Amino\ Acid]_{MW}$                                          | 13        |

# MHC-I association

| Associations               | Definition                                                                                                                      | Equation                                                                                                  | Reference  |
|----------------------------|---------------------------------------------------------------------------------------------------------------------------------|-----------------------------------------------------------------------------------------------------------|------------|
| Antigenicity<br>(modified) | Represents antigenicity potential                                                                                               | $\frac{\text{Hydropathy}}{\text{Recognition}}$                                                            | 17         |
| Pocket Window              | Represents the hydrophobic residue bias for interaction with HLA*A02:01 in pockets a,b,c and f, normalized to the total pockets | $\frac{1}{4} \times [ 1_{\alpha_i \in F,L} + 1_{b_i \in L,M,I,V} + 1_{c_i \in L} + 1_{f_i \in V,L,I,A} ]$ | Figure 2a. |
| Recognition                | Represents molecular visibility, normalized to length                                                                           | $\frac{1}{n} \sum_{R=1}^n [Amino\ Acid]_R$                                                                | 18         |

### Supplementary Note 1.2 – Model descriptions for each classic model used.

To evaluate sequence, physiochemistry, and sequence and physiochemical information to classify strong and weak HLA\*A02:01 antigens from IEDB's database, we list the models used and their parameters below. The parameters listed were determined through a grid search to optimize the F1 score, using a stratifiedKfold approach.

| Classic Model                | Information used           | Parameters             |
|------------------------------|----------------------------|------------------------|
| Logistic Regression          | Sequence                   | C:1, Penalty: L1       |
|                              | Physiochemistry            | C:0.1, Penalty: L1     |
|                              | Sequence + Physiochemistry | C:1, Penalty: L1       |
|                              |                            |                        |
| Random Forest                | Sequence                   | N_estimators: 5000     |
|                              | Physiochemistry            | N_estimators: 1000     |
|                              | Sequence + Physiochemistry | N_estimators: 2500     |
|                              |                            |                        |
| Linear Discriminant Analysis | Sequence                   | Solver: svd            |
|                              | Physiochemistry            | Solver: svd            |
|                              | Sequence + Physiochemistry | Solver: svd            |
|                              |                            |                        |
| Support Vector Machine       | Sequence                   | C: 100, kernel: Linear |
|                              | Physiochemistry            | C: 20, kernel: rbf     |
|                              | Sequence + Physiochemistry | C: 10, kernel: Linear  |

### Supplementary Note 1.3 – Descriptions of models used to predict HLA\*A02:01 binding.

To survey generated neoantigens on existing, gold-standard, experimentally validated models to assess sequence diversity and bias impacts on predictions, we leveraged the models from IEDB's weekly performance survey and recently published deep learning models. We describe each model used below.

| Model         | Prediction Architecture                               | Reference     |
|---------------|-------------------------------------------------------|---------------|
| ACME          | Convolutional Neural Network with attention mechanism | <sup>19</sup> |
| ANN 4.0       | Shallow Neural Network                                | <sup>20</sup> |
| MHCFlurry 2.0 | Convolutional Neural Network with pruned layers       | <sup>21</sup> |
| NetMHCPan 4.1 | Shallow neural network with attention mechanism       | <sup>22</sup> |
| SMM           | Scoring Matrix                                        | <sup>23</sup> |
| SMMPMBEC      | Scoring Matrix                                        | <sup>24</sup> |

## References

- 1 Caldeweyher, E. *et al.* A generally applicable atomic-charge dependent London dispersion correction. *J Chem Phys* **150**, 154122 (2019). <https://doi.org/10.1063/1.5090222>
- 2 Caldeweyher, E., Bannwarth, C. & Grimme, S.
- 3 Marenich, A. V., Cramer, C. J. & Truhlar, D. G. Universal solvation model based on solute electron density and on a continuum model of the solvent defined by the bulk dielectric constant and atomic surface tensions. *J Phys Chem B* **113**, 6378-6396 (2009). <https://doi.org/10.1021/jp810292n>
- 4 Weigend, F. Accurate Coulomb-fitting basis sets for H to Rn. *Phys Chem Chem Phys* **8**, 1057-1065 (2006). <https://doi.org/10.1039/b515623h>
- 5 Weigend, F. & Ahlrichs, R. Balanced basis sets of split valence, triple zeta valence and quadruple zeta valence quality for H to Rn: Design and assessment of accuracy. *Phys Chem Chem Phys* **7**, 3297-3305 (2005). <https://doi.org/10.1039/b508541a>
- 6 Teraoka, I.
- 7 Hutchens, J. O.
- 8 Pascual-Ahuir, J. L. & Silla, E. GEPOL: An improved description of molecular surfaces. I. Building the spherical surface set. *Journal of Computational Chemistry* **11**, 1047-1060 (1990). <https://doi.org/10.1002/jcc.540110907>
- 9 Gilson, M. K. & Irikura, K. K. Symmetry numbers for rigid, flexible, and fluxional molecules: theory and applications.
- 10 Vihinen, M., Torkkila, E. & Riikonen, P. Accuracy of protein flexibility predictions. *Proteins: Structure, Function, and Bioinformatics* **19**, 141-149 (1994). <https://doi.org/10.1002/prot.340190207>
- 11 Smith, D. K., Radivojac P Fau - Obradovic, Z., Obradovic Z Fau - Dunker, A. K., Dunker Ak Fau - Zhu, G. & Zhu, G. Improved amino acid flexibility parameters.
- 12 Bowman, J. *Protein flexibility calculations with Python*, <<https://www.polarmicrobes.org/protein-flexibility-calculation-with-python/>> (2015).
- 13 Cock, P. J. A. *et al.* Biopython: freely available Python tools for computational molecular biology and bioinformatics. *Bioinformatics* **25**, 1422-1423 (2009). <https://doi.org/10.1093/bioinformatics/btp163>
- 14 Chou, P. Y. & Fasman, G. D. Prediction of the secondary structure of proteins from their amino acid sequence. *Adv Enzymol Relat Areas Mol Biol* **47**, 45-148 (1978). <https://doi.org/10.1002/9780470122921.ch2>
- 15 Kyte, J. & Doolittle, R. F.
- 16 Guruprasad, K., Reddy, B. V. & Pandit, M. W. Correlation between stability of a protein and its dipeptide composition: a novel approach for predicting in vivo stability of a protein from its primary sequence. *Protein Eng* **4**, 155-161 (1990). <https://doi.org/10.1093/protein/4.2.155>
- 17 Fraga, S. Theoretical prediction of protein antigenic determinants from amino acid sequences. *Canadian Journal of Chemistry* **60**, 2606-2610 (1982). <https://doi.org/10.1139/v82-374>
- 18 Fraga, S. Recognition of amino acids in solution. *Journal of Molecular Structure* **94**, 251-260 (1983). [https://doi.org/10.1016/0022-2860\(83\)90283-1](https://doi.org/10.1016/0022-2860(83)90283-1)
- 19 Hu, Y. *et al.* ACME: pan-specific peptide-MHC class I binding prediction through attention-based deep neural networks. *Bioinformatics* **35**, 4946-4954 (2019). <https://doi.org/10.1093/bioinformatics/btz427>
- 20 Nielsen, M. *et al.* Reliable prediction of T-cell epitopes using neural networks with novel sequence representations. *Protein Sci* **12**, 1007-1017 (2003). <https://doi.org/10.1110/ps.0239403>
- 21 O'Donnell, T. J., Rubinsteyn, A. & Laserson, U. MHCflurry 2.0: Improved Pan-Allele Prediction of MHC Class I-Presented Peptides by Incorporating Antigen Processing. *Cell systems* **11**, 42-48.e47 (2020). <https://doi.org/10.1016/j.cels.2020.06.010>
- 22 Reynisson, B., Alvarez, B., Paul, S., Peters, B. & Nielsen, M. NetMHCpan-4.1 and NetMHCIIpan-4.0: improved predictions of MHC antigen presentation by concurrent motif deconvolution and integration of MS MHC eluted ligand data. *Nucleic Acids Research* **48**, W449-W454 (2020). <https://doi.org/10.1093/nar/gkaa379> %J Nucleic Acids Research
- 23 Peters, B. & Sette, A. Generating quantitative models describing the sequence specificity of biological processes with the stabilized matrix method.
- 24 Sidney, J. *et al.* Quantitative peptide binding motifs for 19 human and mouse MHC class I molecules derived using positional scanning combinatorial peptide libraries.
